# Supplementary material
Source: Elsevier journal article supplement (https://www.sciencedirect.com/science/article/pii/S1885585724001506)

**Table 1 of the supplementary data. Baseline characteristics of proteomic samples**

|                                          | LAAT/SEC group (n=4) | Control group (n=4) | P    |
|------------------------------------------|----------------------|---------------------|------|
| Age, y                                   | 60.5 ± 18.8          | 60.3 ± 6.1          | .981 |
| Male sex                                 | 3 (75)               | 3 (75)              | .999 |
| Body mass index, kg/m <sup>2</sup>       | 25.8 ± 3.2           | 22.5 ± 2.0          | .119 |
| Smoking                                  | 1 (25)               | 3 (75)              | .999 |
| Alcohol consumption                      | 1 (25)               | 2 (50)              | .999 |
| Heart failure                            | 1 (25)               | 0 (0)               | .999 |
| Hypertension                             | 3 (75)               | 1 (25)              | .486 |
| Diabetes                                 | 1 (25)               | 0 (0)               | .999 |
| Past stroke                              | 1 (25)               | 1 (25)              | .999 |
| Hyperlipidemia                           | 1 (25)               | 0 (0)               | .999 |
| Malignant tumor                          | 0 (0)                | 0 (0)               | -    |
| Coronary heart disease                   | 3 (75)               | 0 (0)               | .143 |
| Anticoagulation therapy                  | 3 (75)               | 1 (25)              | .486 |
| Statins                                  | 2 (50)               | 1 (25)              | .999 |
| Calcium channel blockers                 | 1 (25)               | 0 (0)               | .999 |
| ACEI/ARB                                 | 2 (50)               | 0 (0)               | .429 |
| Beta-blockers                            | 3 (75)               | 1 (25)              | .486 |
| Antiarrhythmic drugs                     | 2 (50)               | 1 (25)              | .999 |
| Diuretics                                | 1 (25)               | 0 (0)               | .999 |
| CHA2DS2-VASc                             | 2.8 ± 1.7            | 1.3 ± 2.5           | .360 |
| HAS-BLED                                 | 1.3 ± 1.3            | 1.3 ± 2.5           | .999 |
| White blood cell count, ×10 <sup>9</sup> | 5.1 ± 0.4            | 5.6 ± 1             | .395 |
| Red blood cell count, ×10 <sup>12</sup>  | 4.4 ± 0.9            | 4.3 ± 0.5           | .776 |
| Hemoglobin, g/L                          | 143.3 ± 22.4         | 131.5 ± 19.6        | .460 |
| Platelet Count, ×10 <sup>9</sup>         | 159.8 ± 43.9         | 182.8 ± 57.6        | .549 |
| Red blood cell distribution width        | 12.2 ± 0.1           | 12.9 ± 0.6          | .053 |
| Blood urea nitrogen, mmol/L              | 5.3 ± 1              | 5.4 ± 0.9           | .972 |
| Blood creatinine, umol/L                 | 76.3 ± 7.5           | 74.3 ± 10.1         | .764 |
| Potassium, K+, mmol/L                    | 3.8 ± 0.1            | 3.9 ± 0.3           | .925 |
| Sodium, Na+, mmol/L                      | 139.5 ± 2.4          | 140.9 ± 2.2         | .403 |
| Chloride, Cl-, mmol/L                    | 106.6 ± 4.4          | 107.7 ± 3.6         | .719 |
| Calcium, Ca <sup>2+</sup> , mmol/L       | 2.2 ± 0.2            | 2.2 ± 0.1           | .908 |
| Alanine aminotransferase, U/L            | 23.1 ± 5.7           | 25 ± 12.9           | .789 |
| Aspartate aminotransferase, U/L          | 22.5 ± 4.1           | 24 ± 9.9            | .800 |
| Total cholesterol, mmol/L                | 4.4 ± 0.6            | 4.5 ± 0.9           | .898 |

|                                  |               |               |        |
|----------------------------------|---------------|---------------|--------|
| <i>Triglycerides, mmol/L</i>     | 1.3 ± 0.6     | 0.9 ± 0.2     | .170   |
| <i>HDL-C, mmol/L</i>             | 1.3 ± 0.3     | 1.6 ± 0.4     | .437   |
| <i>LDL-C, mmol/L</i>             | 2.4 ± 0.3     | 2.3 ± 0.8     | .795   |
| <i>PT, s</i>                     | 12.2 ± 0.5    | 15.6 ± 4.5    | .222   |
| <i>INR</i>                       | 1.1 ± 0       | 1.4 ± 0.4     | .222   |
| <i>Fibrinogen, g/L</i>           | 2.9 ± 0.8     | 2.8 ± 0.4     | .827   |
| <i>APTT, s</i>                   | 31.2 ± 2.5    | 34.7 ± 3.6    | .165   |
| <i>D-Dimer, ng/mL</i>            | 135 ± 148.4   | 89.5 ± 69     | .598   |
| <i>NT-proBNP, pg/mL</i>          | 764.3 ± 489.2 | 63.5 ± 27.9   | .029   |
| <i>Troponin I, pg/mL</i>         | 3.75 ± 4.25   | 2.25 ± 2.87   | .585   |
| <i>LAD, mm</i>                   | 47.3 ± 8.5    | 33.8 ± 3.2    | .024   |
| <i>LVEF, %</i>                   | 52.8 ± 13.9   | 59.5 ± 6.5    | .412   |
| <i>LAAFV, m/s</i>                | 0.273 ± 0.030 | 0.643 ± 0.051 | < .001 |
| <i>MDLAAO, mm</i>                | 27.8 ± 4.3    | 25.7 ± 2.5    | .429   |
| <i>LAA Depth, mm</i>             | 34.3 ± 5.6    | 34.7 ± 9.1    | .932   |
| <i>Morphology classification</i> |               |               | .446   |
| Cauliflower                      | 2 (50)        | 1 (25)        |        |
| Windsack                         | 1 (25)        | 0 (0)         |        |
| Chicken Wing                     | 0 (0)         | 1 (25)        |        |
| Cactus                           | 2 (50)        | 1 (25)        |        |
| Orifice Type                     |               |               | .368   |
| Oval                             | 3 (75)        | 3 (75)        |        |
| Round                            | 1 (25)        | 0 (0)         |        |
| Teardrop                         | 0 (0)         | 0 (0)         |        |
| Triangle                         | 0 (0)         | 0 (0)         |        |
| Footprint                        | 0 (0)         | 0 (0)         |        |

APTT, activated partial thromboplastin time; INR, international normalized ratio; LAA, left atrial appendage; LAAFV, left atrial appendage flow velocity; LAD, left atrial diameter; LVEF, left ventricular ejection fraction; MDLAAO, maximum diameter of left atrial appendage ostium; PT, prothrombin time.

The data are presented as No. (%) or mean ± standard deviation.

**Table 2 of the supplementary data:** Protein identification list

| Protein    | Protein description                                                          | Sequence number |
|------------|------------------------------------------------------------------------------|-----------------|
| A0A075B6H9 | Immunoglobulin lambda variable 4-69                                          | 1               |
| A0A075B6I4 | Immunoglobulin lambda variable 10-54                                         | 1               |
| A0A075B6I9 | Immunoglobulin lambda variable 7-46                                          | 1               |
| A0A075B6J9 | Immunoglobulin lambda variable 2-18                                          | 1               |
| A0A075B6K4 | Immunoglobulin lambda variable 3-10                                          | 2               |
| A0A075B6K5 | Immunoglobulin lambda variable 3-9                                           | 1               |
| A0A075B6P5 | Immunoglobulin kappa variable 2-28                                           | 2               |
| A0A075B6R9 | Probable nonfunctional immunoglobulin kappa variable 2D-24                   | 2               |
| A0A075B6S2 | Immunoglobulin kappa variable 2D-29                                          | 1               |
| A0A075B6S5 | Immunoglobulin kappa variable 1-27                                           | 2               |
| A0A0A0MRZ8 | Immunoglobulin kappa variable 3D-11                                          | 1               |
| A0A0A0MS15 | Immunoglobulin heavy variable 3-49                                           | 1               |
| A0A0A0MT36 | Immunoglobulin kappa variable 6D-21                                          | 1               |
| A0A0B4J1V1 | Immunoglobulin heavy variable 3-21                                           | 1               |
| A0A0B4J1V6 | Immunoglobulin heavy variable 3-73                                           | 2               |
| A0A0B4J1Y8 | Immunoglobulin lambda variable 9-49                                          | 1               |
| A0A0B4J1Y9 | Immunoglobulin heavy variable 3-72                                           | 1               |
| A0A0C4DH32 | Immunoglobulin heavy variable 3-20                                           | 1               |
| A0A0C4DH67 | Immunoglobulin kappa variable 1-8                                            | 3               |
| A0A0C4DH73 | Immunoglobulin kappa variable 1-12                                           | 1               |
| A0A0J9YX35 | Immunoglobulin heavy variable 3-64D                                          | 1               |
| A0FGR8     | Extended synaptotagmin-2                                                     | 1               |
| A0M8Q6     | Immunoglobulin lambda constant 7                                             | 1               |
| A4D1P6     | WD repeat-containing protein 91                                              | 1               |
| E9PAV3     | "Nascent polypeptide-associated complex subunit alpha, muscle-specific form" | 1               |
| O00139     | Kinesin-like protein KIF2A                                                   | 2               |
| O00161     | Synaptosomal-associated protein 23                                           | 2               |
| O00178     | GTP-binding protein 1                                                        | 1               |
| O00187     | Mannan-binding lectin serine protease 2                                      | 6               |
| O00203     | AP-3 complex subunit beta-1                                                  | 1               |
| O00231     | 26S proteasome non-ATPase regulatory subunit 11                              | 2               |
| O00233     | 26S proteasome non-ATPase regulatory subunit 9                               | 1               |
| O00299     | Chloride intracellular channel protein 1                                     | 2               |
| O00339     | Matrilin-2                                                                   | 1               |
| O00391     | Sulfhydryl oxidase 1                                                         | 22              |
| O00410     | Importin-5                                                                   | 2               |
| O00429     | Dynamin-1-like protein                                                       | 4               |
| O00468     | Agrin                                                                        | 1               |
| O00479     | High mobility group nucleosome-binding domain-containing protein 4           | 1               |
| O00534     | von Willebrand factor A domain-containing protein 5A                         | 1               |
| O00571     | ATP-dependent RNA helicase DDX3X                                             | 3               |
| O00602     | Ficolin-1                                                                    | 1               |
| O00626     | C-C motif chemokine 22                                                       | 1               |
| O14561     | "Acyl carrier protein, mitochondrial"                                        | 1               |
| O14602     | "Eukaryotic translation initiation factor 1A, Y-chromosomal                  | 2               |

|        |                                                                          |    |
|--------|--------------------------------------------------------------------------|----|
| O14617 | AP-3 complex subunit delta-1                                             | 1  |
| O14672 | Disintegrin and metalloproteinase domain-containing protein 10           | 4  |
| O14773 | Tripeptidyl-peptidase 1                                                  | 3  |
| O14786 | Neuropilin-1                                                             | 6  |
| O14791 | Apolipoprotein L1                                                        | 14 |
| O14949 | Cytochrome b-c1 complex subunit 8                                        | 1  |
| O14950 | Myosin regulatory light chain 12B                                        | 4  |
| O14960 | Leukocyte cell-derived chemotaxin-2                                      | 3  |
| O14974 | Protein phosphatase 1 regulatory subunit 12A                             | 1  |
| O14979 | Heterogeneous nuclear ribonucleoprotein D-like                           | 1  |
| O15031 | Plexin-B2                                                                | 1  |
| O15117 | FYN-binding protein 1                                                    | 9  |
| O15127 | Secretory carrier-associated membrane protein 2                          | 1  |
| O15143 | Actin-related protein 2/3 complex subunit 1B                             | 7  |
| O15144 | Actin-related protein 2/3 complex subunit 2                              | 5  |
| O15145 | Actin-related protein 2/3 complex subunit 3                              | 4  |
| O15204 | ADAM DEC1                                                                | 3  |
| O15260 | Surfeit locus protein 4                                                  | 1  |
| O15335 | Chondroadherin                                                           | 3  |
| O15372 | Eukaryotic translation initiation factor 3 subunit H                     | 1  |
| O15467 | C-C motif chemokine 16                                                   | 2  |
| O15511 | Actin-related protein 2/3 complex subunit 5                              | 2  |
| O43150 | "Arf-GAP with SH3 domain, ANK repeat and PH domain-containing protein 2" | 2  |
| O43264 | Centromere/kinetochore protein zw10 homolog                              | 1  |
| O43390 | Heterogeneous nuclear ribonucleoprotein R                                | 1  |
| O43427 | Acidic fibroblast growth factor intracellular-binding protein            | 1  |
| O43504 | Ragulator complex protein LAMTOR5                                        | 1  |
| O43583 | Density-regulated protein                                                | 2  |
| O43665 | Regulator of G-protein signaling 10                                      | 1  |
| O43707 | Alpha-actinin-4                                                          | 5  |
| O43768 | Alpha-endosulfine                                                        | 1  |
| O43815 | Striatin                                                                 | 2  |
| O43852 | Calumenin                                                                | 1  |
| O43866 | CD5 antigen-like                                                         | 6  |
| O60229 | Kalirin                                                                  | 2  |
| O60240 | Perilipin-1                                                              | 1  |
| O60243 | Heparan-sulfate 6-O-sulfotransferase 1                                   | 1  |
| O60256 | Phosphoribosyl pyrophosphate synthase-associated protein 2               | 1  |
| O60331 | Phosphatidylinositol 4-phosphate 5-kinase type-1 gamma                   | 1  |
| O60493 | Sorting nexin-3                                                          | 1  |
| O60506 | Heterogeneous nuclear ribonucleoprotein Q                                | 7  |
| O60507 | Protein tyrosine sulfotransferase 1                                      | 2  |
| O60610 | Protein diaphanous homolog 1                                             | 13 |
| O60645 | Exocyst complex component 3                                              | 1  |
| O60664 | Perilipin-3                                                              | 1  |
| O60704 | Protein tyrosine sulfotransferase 2                                      | 1  |
| O60749 | Sorting nexin-2                                                          | 1  |
| O60763 | General vesicular transport factor p115                                  | 1  |

|        |                                                            |   |
|--------|------------------------------------------------------------|---|
| O60841 | Eukaryotic translation initiation factor 5B                | 1 |
| O60844 | Zymogen granule membrane protein 16                        | 4 |
| O60869 | Endothelial differentiation-related factor 1               | 1 |
| O60884 | DnaJ homolog subfamily A member 2                          | 2 |
| O75015 | Low affinity immunoglobulin gamma Fc region receptor III-B | 1 |
| O75083 | WD repeat-containing protein 1                             | 6 |
| O75116 | Rho-associated protein kinase 2                            | 4 |
| O75131 | Copine-3                                                   | 1 |
| O75154 | Rab11 family-interacting protein 3                         | 1 |
| O75339 | Cartilage intermediate layer protein 1                     | 2 |
| O75340 | Programmed cell death protein 6                            | 3 |
| O75348 | V-type proton ATPase subunit G 1                           | 1 |
| O75352 | Mannose-P-dolichol utilization defect 1 protein            | 1 |
| O75367 | Core histone macro-H2A.1                                   | 1 |
| O75390 | "Citrate synthase, mitochondrial"                          | 1 |
| O75531 | Barrier-to-autointegration factor                          | 1 |
| O75558 | Syntaxin-11                                                | 1 |
| O75563 | Src kinase-associated phosphoprotein 2                     | 1 |
| O75610 | Left-right determination factor 1                          | 1 |
| O75636 | Ficolin-3                                                  | 5 |
| O75695 | Protein XRP2                                               | 1 |
| O75787 | Renin receptor                                             | 3 |
| O75821 | Eukaryotic translation initiation factor 3 subunit G       | 1 |
| O75822 | Eukaryotic translation initiation factor 3 subunit J       | 2 |
| O75874 | Isocitrate dehydrogenase [NADP] cytoplasmic                | 3 |
| O75882 | Attractin                                                  | 2 |
| O75915 | PRA1 family protein 3                                      | 1 |
| O75947 | "ATP synthase subunit d, mitochondrial"                    | 1 |
| O75955 | Flotillin-1                                                | 3 |
| O76061 | Stanniocalcin-2                                            | 1 |
| O76074 | "cGMP-specific 3',5'-cyclic phosphodiesterase"             | 3 |
| O76076 | CCN family member 5                                        | 1 |
| O94769 | Extracellular matrix protein 2                             | 3 |
| O94804 | Serine/threonine-protein kinase 10                         | 2 |
| O94826 | Mitochondrial import receptor subunit TOM70                | 1 |
| O94919 | Endonuclease domain-containing 1 protein                   | 1 |
| O94973 | AP-2 complex subunit alpha-2                               | 1 |
| O95084 | Serine protease 23                                         | 1 |
| O95197 | Reticulon-3                                                | 1 |
| O95260 | Arginyl-tRNA--protein transferase 1                        | 2 |
| O95292 | Vesicle-associated membrane protein-associated protein B/C | 1 |
| O95390 | Growth/differentiation factor 11                           | 1 |
| O95445 | Apolipoprotein M                                           | 5 |
| O95674 | Phosphatidate cytidyltransferase 2                         | 1 |
| O95747 | Serine/threonine-protein kinase OSR1                       | 5 |
| O95782 | AP-2 complex subunit alpha-1                               | 1 |
| O95810 | Caveolae-associated protein 2                              | 6 |
| O95825 | Quinone oxidoreductase-like protein 1                      | 1 |

|        |                                                              |     |
|--------|--------------------------------------------------------------|-----|
| O95866 | Megakaryocyte and platelet inhibitory receptor G6b           | 2   |
| O96000 | NADH dehydrogenase [ubiquinone] 1 beta subcomplex subunit 10 | 1   |
| P00325 | All-trans-retinol dehydrogenase [NAD(+)] ADH1B               | 1   |
| P00326 | Alcohol dehydrogenase 1C                                     | 1   |
| P00338 | L-lactate dehydrogenase A chain                              | 4   |
| P00352 | Aldehyde dehydrogenase 1A1                                   | 2   |
| P00367 | "Glutamate dehydrogenase 1, mitochondrial"                   | 1   |
| P00387 | NADH-cytochrome b5 reductase 3                               | 5   |
| P00390 | "Glutathione reductase, mitochondrial"                       | 1   |
| P00441 | Superoxide dismutase [Cu-Zn]                                 | 1   |
| P00450 | Ceruloplasmin                                                | 47  |
| P00451 | Coagulation factor VIII                                      | 31  |
| P00488 | Coagulation factor XIII A chain                              | 14  |
| P00491 | Purine nucleoside phosphorylase                              | 1   |
| P00558 | Phosphoglycerate kinase 1                                    | 12  |
| P00568 | Adenylate kinase isoenzyme 1                                 | 4   |
| P00734 | Prothrombin                                                  | 25  |
| P00736 | Complement C1r subcomponent                                  | 26  |
| P00738 | Haptoglobin                                                  | 30  |
| P00739 | Haptoglobin-related protein                                  | 8   |
| P00740 | Coagulation factor IX                                        | 6   |
| P00742 | Coagulation factor X                                         | 9   |
| P00746 | Complement factor D                                          | 21  |
| P00747 | Plasminogen                                                  | 79  |
| P00748 | Coagulation factor XII                                       | 30  |
| P00750 | Tissue-type plasminogen activator                            | 9   |
| P00751 | Complement factor B                                          | 30  |
| P00915 | Carbonic anhydrase 1                                         | 5   |
| P00918 | Carbonic anhydrase 2                                         | 5   |
| P01008 | Antithrombin-III                                             | 35  |
| P01009 | Alpha-1-antitrypsin                                          | 57  |
| P01011 | Alpha-1-antichymotrypsin                                     | 20  |
| P01019 | Angiotensinogen                                              | 11  |
| P01023 | Alpha-2-macroglobulin                                        | 87  |
| P01024 | Complement C3                                                | 162 |
| P01031 | Complement C5                                                | 36  |
| P01034 | Cystatin-C                                                   | 8   |
| P01040 | Cystatin-A                                                   | 1   |
| P01042 | Kininogen-1                                                  | 64  |
| P01116 | GTPase KRas                                                  | 1   |
| P01137 | Transforming growth factor beta-1 proprotein                 | 9   |
| P01344 | Insulin-like growth factor II                                | 1   |
| P01591 | Immunoglobulin J chain                                       | 3   |
| P01597 | Immunoglobulin kappa variable 1-39                           | 2   |
| P01599 | Immunoglobulin kappa variable 1-17                           | 1   |
| P01602 | Immunoglobulin kappa variable 1-5                            | 2   |
| P01619 | Immunoglobulin kappa variable 3-20                           | 1   |
| P01624 | Immunoglobulin kappa variable 3-15                           | 1   |

|        |                                             |    |
|--------|---------------------------------------------|----|
| P01700 | Immunoglobulin lambda variable 1-47         | 2  |
| P01701 | Immunoglobulin lambda variable 1-51         | 4  |
| P01714 | Immunoglobulin lambda variable 3-19         | 2  |
| P01717 | Immunoglobulin lambda variable 3-25         | 2  |
| P01718 | Immunoglobulin lambda variable 3-27         | 1  |
| P01721 | Immunoglobulin lambda variable 6-57         | 1  |
| P01732 | T-cell surface glycoprotein CD8 alpha chain | 1  |
| P01764 | Immunoglobulin heavy variable 3-23          | 2  |
| P01766 | Immunoglobulin heavy variable 3-13          | 1  |
| P01768 | Immunoglobulin heavy variable 3-30          | 5  |
| P01780 | Immunoglobulin heavy variable 3-7           | 1  |
| P01782 | Immunoglobulin heavy variable 3-9           | 2  |
| P01833 | Polymeric immunoglobulin receptor           | 5  |
| P01834 | Immunoglobulin kappa constant               | 2  |
| P01859 | Immunoglobulin heavy constant gamma 2       | 10 |
| P01860 | Immunoglobulin heavy constant gamma 3       | 28 |
| P01861 | Immunoglobulin heavy constant gamma 4       | 7  |
| P01871 | Immunoglobulin heavy constant mu            | 28 |
| P01876 | Immunoglobulin heavy constant alpha 1       | 11 |
| P02042 | Hemoglobin subunit delta                    | 2  |
| P02100 | Hemoglobin subunit epsilon                  | 1  |
| P02144 | Myoglobin                                   | 1  |
| P02533 | "Keratin, type I cytoskeletal 14"           | 29 |
| P02538 | "Keratin, type II cytoskeletal 6A"          | 18 |
| P02545 | Prelamin-A/C                                | 2  |
| P02549 | "Spectrin alpha chain, erythrocytic 1"      | 11 |
| P02647 | Apolipoprotein A-I                          | 75 |
| P02649 | Apolipoprotein E                            | 54 |
| P02652 | Apolipoprotein A-II                         | 15 |
| P02654 | Apolipoprotein C-I                          | 14 |
| P02655 | Apolipoprotein C-II                         | 9  |
| P02656 | Apolipoprotein C-III                        | 12 |
| P02671 | Fibrinogen alpha chain                      | 87 |
| P02675 | Fibrinogen beta chain                       | 66 |
| P02679 | Fibrinogen gamma chain                      | 50 |
| P02730 | Band 3 anion transport protein              | 9  |
| P02743 | Serum amyloid P-component                   | 2  |
| P02745 | Complement C1q subcomponent subunit A       | 8  |
| P02746 | Complement C1q subcomponent subunit B       | 9  |
| P02747 | Complement C1q subcomponent subunit C       | 8  |
| P02748 | Complement component C9                     | 13 |
| P02749 | Beta-2-glycoprotein 1                       | 21 |
| P02750 | Leucine-rich alpha-2-glycoprotein           | 4  |
| P02751 | Fibronectin                                 | 58 |
| P02753 | Retinol-binding protein 4                   | 2  |
| P02760 | Protein AMBP                                | 6  |
| P02763 | Alpha-1-acid glycoprotein 1                 | 10 |
| P02765 | Alpha-2-HS-glycoprotein                     | 10 |

|        |                                                                          |     |
|--------|--------------------------------------------------------------------------|-----|
| P02766 | Transthyretin                                                            | 13  |
| P02768 | Albumin                                                                  | 98  |
| P02774 | Vitamin D-binding protein                                                | 17  |
| P02775 | Platelet basic protein                                                   | 9   |
| P02776 | Platelet factor 4                                                        | 5   |
| P02786 | Transferrin receptor protein 1                                           | 4   |
| P02787 | Serotransferrin                                                          | 46  |
| P02788 | Lactotransferrin                                                         | 43  |
| P02790 | Hemopexin                                                                | 22  |
| P02810 | Salivary acidic proline-rich phosphoprotein 1/2                          | 1   |
| P03950 | Angiogenin                                                               | 23  |
| P03951 | Coagulation factor XI                                                    | 47  |
| P03952 | Plasma kallikrein                                                        | 45  |
| P03956 | Interstitial collagenase                                                 | 1   |
| P04003 | C4b-binding protein alpha chain                                          | 21  |
| P04004 | Vitronectin                                                              | 51  |
| P04040 | Catalase                                                                 | 6   |
| P04070 | Vitamin K-dependent protein C                                            | 7   |
| P04075 | Fructose-bisphosphate aldolase A                                         | 11  |
| P04083 | Annexin A1                                                               | 2   |
| P04085 | Platelet-derived growth factor subunit A                                 | 1   |
| P04114 | Apolipoprotein B-100                                                     | 394 |
| P04156 | Major prion protein                                                      | 4   |
| P04179 | "Superoxide dismutase [Mn], mitochondrial"                               | 2   |
| P04196 | Histidine-rich glycoprotein                                              | 63  |
| P04217 | Alpha-1B-glycoprotein                                                    | 16  |
| P04259 | "Keratin, type II cytoskeletal 6B"                                       | 1   |
| P04264 | "Keratin, type II cytoskeletal 1"                                        | 34  |
| P04275 | von Willebrand factor                                                    | 59  |
| P04278 | Sex hormone-binding globulin                                             | 11  |
| P04406 | Glyceraldehyde-3-phosphate dehydrogenase                                 | 24  |
| P04424 | Argininosuccinate lyase                                                  | 1   |
| P04430 | Immunoglobulin kappa variable 1-16                                       | 2   |
| P04439 | "HLA class I histocompatibility antigen, A alpha chain"                  | 5   |
| P04632 | Calpain small subunit 1                                                  | 2   |
| P04792 | Heat shock protein beta-1                                                | 3   |
| P04843 | Dolichyl-diphosphooligosaccharide--protein glycosyltransferase subunit 1 | 3   |
| P04844 | Dolichyl-diphosphooligosaccharide--protein glycosyltransferase subunit 2 | 3   |
| P04899 | Guanine nucleotide-binding protein G(i) subunit alpha-2                  | 7   |
| P04908 | Histone H2A type 1-B/E                                                   | 4   |
| P05019 | Insulin-like growth factor I                                             | 4   |
| P05023 | Sodium/potassium-transporting ATPase subunit alpha-1                     | 1   |
| P05062 | Fructose-bisphosphate aldolase B                                         | 3   |
| P05067 | Amyloid-beta precursor protein                                           | 2   |
| P05089 | Arginase-1                                                               | 1   |
| P05090 | Apolipoprotein D                                                         | 11  |
| P05106 | Integrin beta-3                                                          | 10  |
| P05107 | Integrin beta-2                                                          | 2   |



|        |                                                      |    |
|--------|------------------------------------------------------|----|
| P05109 | Protein S100-A8                                      | 4  |
| P05121 | Plasminogen activator inhibitor 1                    | 2  |
| P05154 | Plasma serine protease inhibitor                     | 17 |
| P05155 | Plasma protease C1 inhibitor                         | 34 |
| P05156 | Complement factor I                                  | 14 |
| P05160 | Coagulation factor XIII B chain                      | 5  |
| P05164 | Myeloperoxidase                                      | 18 |
| P05198 | Eukaryotic translation initiation factor 2 subunit 1 | 2  |
| P05204 | Non-histone chromosomal protein HMG-17               | 2  |
| P05452 | Tetranectin                                          | 9  |
| P05543 | Thyroxine-binding globulin                           | 6  |
| P05546 | Heparin cofactor 2                                   | 20 |
| P05556 | Integrin beta-1                                      | 6  |
| P05981 | Serine protease hepsin                               | 1  |
| P06276 | Cholinesterase                                       | 1  |
| P06312 | Immunoglobulin kappa variable 4-1                    | 2  |
| P06331 | Immunoglobulin heavy variable 4-34                   | 1  |
| P06396 | Gelsolin                                             | 61 |
| P06576 | "ATP synthase subunit beta, mitochondrial"           | 7  |
| P06681 | Complement C2                                        | 15 |
| P06702 | Protein S100-A9                                      | 5  |
| P06727 | Apolipoprotein A-IV                                  | 55 |
| P06730 | Eukaryotic translation initiation factor 4E          | 1  |
| P06733 | Alpha-enolase                                        | 10 |
| P06737 | "Glycogen phosphorylase, liver form"                 | 1  |
| P06744 | Glucose-6-phosphate isomerase                        | 1  |
| P06753 | Tropomyosin alpha-3 chain                            | 8  |
| P06858 | Lipoprotein lipase                                   | 8  |
| P07093 | Glia-derived nexin                                   | 4  |
| P07195 | L-lactate dehydrogenase B chain                      | 2  |
| P07203 | Glutathione peroxidase 1                             | 4  |
| P07225 | Vitamin K-dependent protein S                        | 22 |
| P07237 | Protein disulfide-isomerase                          | 8  |
| P07305 | Histone H1.0                                         | 1  |
| P07307 | Asialoglycoprotein receptor 2                        | 1  |
| P07339 | Cathepsin D                                          | 1  |
| P07355 | Annexin A2                                           | 4  |
| P07357 | Complement component C8 alpha chain                  | 8  |
| P07358 | Complement component C8 beta chain                   | 27 |
| P07359 | Platelet glycoprotein Ib alpha chain                 | 6  |
| P07360 | Complement component C8 gamma chain                  | 6  |
| P07384 | Calpain-1 catalytic subunit                          | 12 |
| P07477 | Serine protease 1                                    | 1  |
| P07585 | Decorin                                              | 2  |
| P07711 | Procathepsin L                                       | 1  |
| P07737 | Profilin-1                                           | 4  |
| P07741 | Adenine phosphoribosyltransferase                    | 2  |
| P07814 | Bifunctional glutamate/proline--tRNA ligase          | 3  |

|        |                                                    |    |
|--------|----------------------------------------------------|----|
| P07900 | Heat shock protein HSP 90-alpha                    | 9  |
| P07910 | Heterogeneous nuclear ribonucleoproteins C1/C2     | 2  |
| P07919 | "Cytochrome b-c1 complex subunit 6, mitochondrial" | 1  |
| P07948 | Tyrosine-protein kinase Lyn                        | 1  |
| P07951 | Tropomyosin beta chain                             | 1  |
| P07996 | Thrombospondin-1                                   | 41 |
| P07998 | Ribonuclease pancreatic                            | 4  |
| P08123 | Collagen alpha-2(I) chain                          | 1  |
| P08133 | Annexin A6                                         | 4  |
| P08174 | Complement decay-accelerating factor               | 1  |
| P08185 | Corticosteroid-binding globulin                    | 7  |
| P08195 | 4F2 cell surface antigen heavy chain               | 1  |
| P08238 | Heat shock protein HSP 90-beta                     | 11 |
| P08253 | 72 kDa type IV collagenase                         | 1  |
| P08294 | Extracellular superoxide dismutase [Cu-Zn]         | 2  |
| P08311 | Cathepsin G                                        | 2  |
| P08319 | All-trans-retinol dehydrogenase [NAD(+)] ADH4      | 10 |
| P08493 | Matrix Gla protein                                 | 2  |
| P08514 | Integrin alpha-IIb                                 | 22 |
| P08519 | Apolipoprotein(a)                                  | 24 |
| P08567 | Pleckstrin                                         | 12 |
| P08571 | Monocyte differentiation antigen CD14              | 5  |
| P08574 | "Cytochrome c1, heme protein, mitochondrial"       | 1  |
| P08575 | Receptor-type tyrosine-protein phosphatase C       | 4  |
| P08603 | Complement factor H                                | 50 |
| P08670 | Vimentin                                           | 3  |
| P08697 | Alpha-2-antiplasmin                                | 15 |
| P08708 | 40S ribosomal protein S17                          | 3  |
| P08709 | Coagulation factor VII                             | 5  |
| P08779 | "Keratin, type I cytoskeletal 16"                  | 8  |
| P08833 | Insulin-like growth factor-binding protein 1       | 1  |
| P09172 | Dopamine beta-hydroxylase                          | 2  |
| P09211 | Glutathione S-transferase P                        | 3  |
| P09237 | Matrilysin                                         | 1  |
| P09382 | Galectin-1                                         | 3  |
| P09429 | High mobility group protein B1                     | 5  |
| P09486 | SPARC                                              | 3  |
| P09493 | Tropomyosin alpha-1 chain                          | 1  |
| P09525 | Annexin A4                                         | 1  |
| P09529 | Inhibin beta B chain                               | 4  |
| P09543 | "2',3'-cyclic-nucleotide 3'-phosphodiesterase"     | 7  |
| P09622 | "Dihydrolipoyl dehydrogenase, mitochondrial"       | 4  |
| P09651 | Heterogeneous nuclear ribonucleoprotein A1         | 4  |
| P09668 | Pro-cathepsin H                                    | 2  |
| P09669 | Cytochrome c oxidase subunit 6C                    | 2  |
| P09871 | Complement C1s subcomponent                        | 18 |
| P09960 | Leukotriene A-4 hydrolase                          | 1  |
| P09972 | Fructose-bisphosphate aldolase C                   | 1  |

|        |                                                                     |     |
|--------|---------------------------------------------------------------------|-----|
| P0C0L4 | Complement C4-A                                                     | 108 |
| P0C0L5 | Complement C4-B                                                     | 1   |
| P0C0S8 | Histone H2A type 1                                                  | 1   |
| P0CG38 | POTE ankyrin domain family member I                                 | 1   |
| P0CG47 | Polyubiquitin-B                                                     | 1   |
| P0DJI8 | Serum amyloid A-1 protein                                           | 11  |
| P0DJI9 | Serum amyloid A-2 protein                                           | 3   |
| P0DMM9 | Sulfotransferase 1A3                                                | 1   |
| P0DMV8 | Heat shock 70 kDa protein 1A                                        | 10  |
| P0DOX2 | Immunoglobulin alpha-2 heavy chain                                  | 8   |
| P0DOX3 | Immunoglobulin delta heavy chain                                    | 3   |
| P0DOX5 | Immunoglobulin gamma-1 heavy chain                                  | 16  |
| P0DOX7 | Immunoglobulin kappa light chain                                    | 11  |
| P0DOX8 | Immunoglobulin lambda-1 light chain                                 | 5   |
| P0DOY3 | Immunoglobulin lambda constant 3                                    | 4   |
| P0DP02 | Immunoglobulin heavy variable 3-30-3                                | 2   |
| P0DP23 | Calmodulin-1                                                        | 2   |
| P0DPH7 | Tubulin alpha-3C chain                                              | 1   |
| P0DTE1 | Probable nonfunctional immunoglobulin heavy variable 3-38-3         | 1   |
| P10124 | Serglycin                                                           | 2   |
| P10155 | RNA-binding protein RO60                                            | 3   |
| P10412 | Histone H1.4                                                        | 2   |
| P10599 | Thioredoxin                                                         | 3   |
| P10606 | "Cytochrome c oxidase subunit 5B, mitochondrial"                    | 1   |
| P10643 | Complement component C7                                             | 11  |
| P10644 | cAMP-dependent protein kinase type I-alpha regulatory subunit       | 2   |
| P10645 | Chromogranin-A                                                      | 1   |
| P10646 | Tissue factor pathway inhibitor                                     | 7   |
| P10720 | Platelet factor 4 variant                                           | 7   |
| P10768 | S-formylglutathione hydrolase                                       | 1   |
| P10809 | "60 kDa heat shock protein, mitochondrial"                          | 10  |
| P10909 | Clusterin                                                           | 48  |
| P11021 | Endoplasmic reticulum chaperone BiP                                 | 28  |
| P11142 | Heat shock cognate 71 kDa protein                                   | 12  |
| P11150 | Hepatic triacylglycerol lipase                                      | 4   |
| P11166 | "Solute carrier family 2, facilitated glucose transporter member 1" | 3   |
| P11169 | "Solute carrier family 2, facilitated glucose transporter member 3" | 3   |
| P11171 | Protein 4.1                                                         | 7   |
| P11215 | Integrin alpha-M                                                    | 5   |
| P11216 | "Glycogen phosphorylase, brain form"                                | 4   |
| P11226 | Mannose-binding protein C                                           | 3   |
| P11234 | Ras-related protein Ral-B                                           | 4   |
| P11274 | Breakpoint cluster region protein                                   | 1   |
| P11277 | "Spectrin beta chain, erythrocytic"                                 | 20  |
| P11310 | "Medium-chain specific acyl-CoA dehydrogenase, mitochondrial"       | 1   |
| P11413 | Glucose-6-phosphate 1-dehydrogenase                                 | 4   |
| P11586 | "C-1-tetrahydrofolate synthase, cytoplasmic"                        | 1   |
| P11597 | Cholesteryl ester transfer protein                                  | 16  |

|        |                                                               |     |
|--------|---------------------------------------------------------------|-----|
| P11766 | Alcohol dehydrogenase class-3                                 | 1   |
| P11940 | Polyadenylate-binding protein 1                               | 7   |
| P12109 | Collagen alpha-1(VI) chain                                    | 9   |
| P12110 | Collagen alpha-2(VI) chain                                    | 1   |
| P12111 | Collagen alpha-3(VI) chain                                    | 35  |
| P12236 | ADP/ATP translocase 3                                         | 1   |
| P12259 | Coagulation factor V                                          | 115 |
| P12273 | Prolactin-inducible protein                                   | 1   |
| P12724 | Eosinophil cationic protein                                   | 3   |
| P12814 | Alpha-actinin-1                                               | 35  |
| P12829 | Myosin light chain 4                                          | 1   |
| P12830 | Cadherin-1                                                    | 6   |
| P12931 | Proto-oncogene tyrosine-protein kinase Src                    | 1   |
| P12955 | Xaa-Pro dipeptidase                                           | 1   |
| P13073 | "Cytochrome c oxidase subunit 4 isoform 1, mitochondrial"     | 1   |
| P13224 | Platelet glycoprotein Ib beta chain                           | 1   |
| P13473 | Lysosome-associated membrane glycoprotein 2                   | 1   |
| P13489 | Ribonuclease inhibitor                                        | 1   |
| P13497 | Bone morphogenetic protein 1                                  | 1   |
| P13501 | C-C motif chemokine 5                                         | 1   |
| P13611 | Versican core protein                                         | 1   |
| P13639 | Elongation factor 2                                           | 4   |
| P13645 | "Keratin, type I cytoskeletal 10"                             | 41  |
| P13647 | "Keratin, type II cytoskeletal 5"                             | 9   |
| P13667 | Protein disulfide-isomerase A4                                | 4   |
| P13671 | Complement component C6                                       | 19  |
| P13686 | Tartrate-resistant acid phosphatase type 5                    | 2   |
| P13693 | Translationally-controlled tumor protein                      | 2   |
| P13716 | Delta-aminolevulinic acid dehydratase                         | 2   |
| P13796 | Plastin-2                                                     | 4   |
| P13797 | Plastin-3                                                     | 1   |
| P13804 | "Electron transfer flavoprotein subunit alpha, mitochondrial" | 3   |
| P13929 | Beta-enolase                                                  | 1   |
| P14151 | L-selectin                                                    | 1   |
| P14317 | Hematopoietic lineage cell-specific protein                   | 1   |
| P14543 | Nidogen-1                                                     | 3   |
| P14598 | Neutrophil cytosol factor 1                                   | 3   |
| P14618 | Pyruvate kinase PKM                                           | 18  |
| P14625 | Endoplasmic reticulum chaperone protein                       | 13  |
| P14649 | Myosin light chain 6B                                         | 1   |
| P14770 | Platelet glycoprotein IX                                      | 3   |
| P14780 | Matrix metalloproteinase-9                                    | 2   |
| P14866 | Heterogeneous nuclear ribonucleoprotein L                     | 1   |
| P14868 | "Aspartate--tRNA ligase, cytoplasmic"                         | 2   |
| P14923 | Junction plakoglobin                                          | 3   |
| P15090 | "Fatty acid-binding protein, adipocyte"                       | 1   |
| P15153 | Ras-related C3 botulinum toxin substrate 2                    | 3   |
| P15169 | Carboxypeptidase N catalytic chain                            | 23  |

|        |                                                                     |    |
|--------|---------------------------------------------------------------------|----|
| P15172 | Myoblast determination protein 1                                    | 1  |
| P15311 | Ezrin                                                               | 7  |
| P15498 | Proto-oncogene vav                                                  | 1  |
| P15502 | Elastin                                                             | 3  |
| P15531 | Nucleoside diphosphate kinase A                                     | 1  |
| P15880 | 40S ribosomal protein S2                                            | 1  |
| P15907 | "Beta-galactoside alpha-2,6-sialyltransferase 1"                    | 7  |
| P15924 | Desmoplakin                                                         | 6  |
| P16070 | CD44 antigen                                                        | 1  |
| P16109 | P-selectin                                                          | 1  |
| P16152 | Carbonyl reductase [NADPH] 1                                        | 2  |
| P16157 | Ankyrin-1                                                           | 12 |
| P16278 | Beta-galactosidase                                                  | 1  |
| P16284 | Platelet endothelial cell adhesion molecule                         | 3  |
| P16452 | Protein 4.2                                                         | 3  |
| P16615 | Sarcoplasmic/endoplasmic reticulum calcium ATPase 2                 | 2  |
| P16671 | Platelet glycoprotein 4                                             | 6  |
| P16885 | "1-phosphatidylinositol 4,5-bisphosphate phosphodiesterase gamma-2" | 2  |
| P17252 | Protein kinase C alpha type                                         | 2  |
| P17301 | Integrin alpha-2                                                    | 1  |
| P17812 | CTP synthase 1                                                      | 1  |
| P17844 | Probable ATP-dependent RNA helicase DDX5                            | 2  |
| P17858 | "ATP-dependent 6-phosphofructokinase, liver type"                   | 2  |
| P17931 | Galectin-3                                                          | 2  |
| P17936 | Insulin-like growth factor-binding protein 3                        | 21 |
| P17987 | T-complex protein 1 subunit alpha                                   | 3  |
| P18054 | Polyunsaturated fatty acid lipoygenase ALOX12                       | 1  |
| P18065 | Insulin-like growth factor-binding protein 2                        | 12 |
| P18085 | ADP-ribosylation factor 4                                           | 2  |
| P18206 | Vinculin                                                            | 15 |
| P18428 | Lipopolysaccharide-binding protein                                  | 33 |
| P18433 | Receptor-type tyrosine-protein phosphatase alpha                    | 1  |
| P19021 | Peptidyl-glycine alpha-amidating monooxygenase                      | 4  |
| P19338 | Nucleolin                                                           | 1  |
| P19367 | Hexokinase-1                                                        | 1  |
| P19652 | Alpha-1-acid glycoprotein 2                                         | 5  |
| P19823 | Inter-alpha-trypsin inhibitor heavy chain H2                        | 33 |
| P19827 | Inter-alpha-trypsin inhibitor heavy chain H1                        | 45 |
| P19838 | Nuclear factor NF-kappa-B p105 subunit                              | 1  |
| P19957 | Elafin                                                              | 1  |
| P19971 | Thymidine phosphorylase                                             | 2  |
| P20042 | Eukaryotic translation initiation factor 2 subunit 2                | 1  |
| P20062 | Transcobalamin-2                                                    | 3  |
| P20160 | Azurocidin                                                          | 3  |
| P20340 | Ras-related protein Rab-6A                                          | 1  |
| P20618 | Proteasome subunit beta type-1                                      | 2  |
| P20742 | Pregnancy zone protein                                              | 2  |
| P20810 | Calpastatin                                                         | 1  |

|        |                                                            |    |
|--------|------------------------------------------------------------|----|
| P20851 | C4b-binding protein beta chain                             | 3  |
| P20908 | Collagen alpha-1(V) chain                                  | 1  |
| P20930 | Filaggrin                                                  | 3  |
| P20936 | Ras GTPase-activating protein 1                            | 1  |
| P21291 | Cysteine and glycine-rich protein 1                        | 5  |
| P21333 | Filamin-A                                                  | 96 |
| P21399 | Cytoplasmic aconitate hydratase                            | 1  |
| P21695 | "Glycerol-3-phosphate dehydrogenase [NAD(+)], cytoplasmic" | 1  |
| P21796 | Voltage-dependent anion-selective channel protein 1        | 3  |
| P21810 | Biglycan                                                   | 4  |
| P21926 | CD9 antigen                                                | 3  |
| P21964 | Catechol O-methyltransferase                               | 1  |
| P22061 | Protein-L-isoaspartate(D-aspartate) O-methyltransferase    | 4  |
| P22105 | Tenascin-X                                                 | 8  |
| P22307 | Sterol carrier protein 2                                   | 3  |
| P22352 | Glutathione peroxidase 3                                   | 5  |
| P22392 | Nucleoside diphosphate kinase B                            | 6  |
| P22626 | Heterogeneous nuclear ribonucleoproteins A2/B1             | 2  |
| P22681 | E3 ubiquitin-protein ligase CBL                            | 1  |
| P22692 | Insulin-like growth factor-binding protein 4               | 8  |
| P22694 | cAMP-dependent protein kinase catalytic subunit beta       | 2  |
| P22695 | "Cytochrome b-c1 complex subunit 2, mitochondrial"         | 2  |
| P22792 | Carboxypeptidase N subunit 2                               | 5  |
| P23142 | Fibulin-1                                                  | 7  |
| P23219 | Prostaglandin G/H synthase 1                               | 2  |
| P23229 | Integrin alpha-6                                           | 6  |
| P23246 | "Splicing factor, proline- and glutamine-rich"             | 2  |
| P23284 | Peptidyl-prolyl cis-trans isomerase B                      | 12 |
| P23381 | "Tryptophan--tRNA ligase, cytoplasmic"                     | 8  |
| P23526 | Adenosylhomocysteinase                                     | 2  |
| P23527 | Histone H2B type 1-O                                       | 5  |
| P23528 | Cofilin-1                                                  | 14 |
| P23560 | Brain-derived neurotrophic factor                          | 1  |
| P23588 | Eukaryotic translation initiation factor 4B                | 3  |
| P23743 | Diacylglycerol kinase alpha                                | 1  |
| P24158 | Myeloblastin                                               | 2  |
| P24539 | "ATP synthase F(0) complex subunit B1, mitochondrial"      | 2  |
| P24557 | Thromboxane-A synthase                                     | 1  |
| P24592 | Insulin-like growth factor-binding protein 6               | 4  |
| P24593 | Insulin-like growth factor-binding protein 5               | 16 |
| P24666 | Low molecular weight phosphotyrosine protein phosphatase   | 1  |
| P24752 | "Acetyl-CoA acetyltransferase, mitochondrial"              | 1  |
| P24821 | Tenascin                                                   | 1  |
| P24844 | Myosin regulatory light polypeptide 9                      | 2  |
| P24941 | Cyclin-dependent kinase 2                                  | 1  |
| P25311 | Zinc-alpha-2-glycoprotein                                  | 9  |
| P25325 | 3-mercaptopyruvate sulfurtransferase                       | 1  |
| P25398 | 40S ribosomal protein S12                                  | 1  |

|        |                                                                                   |    |
|--------|-----------------------------------------------------------------------------------|----|
| P25685 | DnaJ homolog subfamily B member 1                                                 | 3  |
| P25705 | "ATP synthase subunit alpha, mitochondrial"                                       | 4  |
| P25774 | Cathepsin S                                                                       | 5  |
| P25787 | Proteasome subunit alpha type-2                                                   | 1  |
| P25788 | Proteasome subunit alpha type-3                                                   | 1  |
| P26038 | Moesin                                                                            | 23 |
| P26447 | Protein S100-A4                                                                   | 2  |
| P26572 | "Alpha-1,3-mannosyl-glycoprotein 2-beta-N-acetylglucosaminyltransferase"          | 5  |
| P26583 | High mobility group protein B2                                                    | 2  |
| P26599 | Polypyrimidine tract-binding protein 1                                            | 4  |
| P26640 | Valine--tRNA ligase                                                               | 1  |
| P26641 | Elongation factor 1-gamma                                                         | 3  |
| P26927 | Hepatocyte growth factor-like protein                                             | 16 |
| P27105 | Stomatin                                                                          | 3  |
| P27169 | Serum paraoxonase/arylesterase 1                                                  | 15 |
| P27348 | 14-3-3 protein theta                                                              | 1  |
| P27695 | DNA-(apurinic or apyrimidinic site) endonuclease                                  | 2  |
| P27797 | Calreticulin                                                                      | 7  |
| P27824 | Calnexin                                                                          | 5  |
| P27918 | Properdin                                                                         | 2  |
| P28062 | Proteasome subunit beta type-8                                                    | 1  |
| P28300 | Protein-lysine 6-oxidase                                                          | 2  |
| P28907 | ADP-ribosyl cyclase/cyclic ADP-ribose hydrolase 1                                 | 1  |
| P29122 | Proprotein convertase subtilisin/kexin type 6                                     | 3  |
| P29350 | Tyrosine-protein phosphatase nonreceptor type 6                                   | 6  |
| P29401 | Transketolase                                                                     | 2  |
| P29622 | Kallistatin                                                                       | 21 |
| P29966 | Myristoylated alanine-rich C-kinase substrate                                     | 2  |
| P30041 | Peroxiredoxin-6                                                                   | 6  |
| P30043 | Flavin reductase (NADPH)                                                          | 7  |
| P30048 | "Thioredoxin-dependent peroxide reductase, mitochondrial"                         | 1  |
| P30084 | "Enoyl-CoA hydratase, mitochondrial"                                              | 1  |
| P30086 | Phosphatidylethanolamine-binding protein 1                                        | 2  |
| P30101 | Protein disulfide-isomerase A3                                                    | 10 |
| P30153 | Serine/threonine-protein phosphatase 2A 65 kDa regulatory subunit A alpha isoform | 5  |
| P30273 | High affinity immunoglobulin epsilon receptor subunit gamma                       | 1  |
| P30405 | "Peptidyl-prolyl cis-trans isomerase F, mitochondrial"                            | 1  |
| P30419 | Glycylpeptide N-tetradecanoyltransferase 1                                        | 1  |
| P30566 | Adenylosuccinate lyase                                                            | 2  |
| P30740 | Leukocyte elastase inhibitor                                                      | 4  |
| P31146 | Coronin-1A                                                                        | 4  |
| P31151 | Protein S100-A7                                                                   | 2  |
| P31689 | DnaJ homolog subfamily A member 1                                                 | 1  |
| P31749 | RAC-alpha serine/threonine-protein kinase                                         | 1  |
| P31930 | "Cytochrome b-c1 complex subunit 1, mitochondrial"                                | 1  |
| P31937 | "3-hydroxyisobutyrate dehydrogenase, mitochondrial"                               | 1  |
| P31942 | Heterogeneous nuclear ribonucleoprotein H3                                        | 1  |

|        |                                                                               |     |
|--------|-------------------------------------------------------------------------------|-----|
| P31944 | Caspase-14                                                                    | 4   |
| P31946 | 14-3-3 protein beta/alpha                                                     | 3   |
| P31948 | Stress-induced-phosphoprotein 1                                               | 17  |
| P31997 | Carcinoembryonic antigen-related cell adhesion molecule 8                     | 1   |
| P32119 | Peroxiredoxin-2                                                               | 3   |
| P32121 | Beta-arrestin-2                                                               | 1   |
| P33151 | Cadherin-5                                                                    | 2   |
| P33176 | Kinesin-1 heavy chain                                                         | 5   |
| P33908 | "Mannosyl-oligosaccharide 1,2-alpha-mannosidase IA"                           | 4   |
| P34096 | Ribonuclease 4                                                                | 6   |
| P34810 | Macrosialin                                                                   | 1   |
| P34932 | Heat shock 70 kDa protein 4                                                   | 1   |
| P35232 | Prohibitin 1                                                                  | 2   |
| P35241 | Radixin                                                                       | 18  |
| P35251 | Replication factor C subunit 1                                                | 1   |
| P35443 | Thrombospondin-4                                                              | 5   |
| P35527 | "Keratin, type I cytoskeletal 9"                                              | 38  |
| P35542 | Serum amyloid A-4 protein                                                     | 8   |
| P35555 | Fibrillin-1                                                                   | 1   |
| P35579 | Myosin-9                                                                      | 100 |
| P35580 | Myosin-10                                                                     | 1   |
| P35611 | Alpha-adducin                                                                 | 3   |
| P35613 | Basigin                                                                       | 3   |
| P35625 | Metalloproteinase inhibitor 3                                                 | 1   |
| P35754 | Glutaredoxin-1                                                                | 1   |
| P35858 | Insulin-like growth factor-binding protein complex acid labile subunit        | 18  |
| P35908 | "Keratin, type II cytoskeletal 2 epidermal"                                   | 33  |
| P35914 | "Hydroxymethylglutaryl-CoA lyase, mitochondrial"                              | 1   |
| P36507 | Dual specificity mitogen-activated protein kinase kinase 2                    | 2   |
| P36542 | "ATP synthase subunit gamma, mitochondrial"                                   | 1   |
| P36543 | V-type proton ATPase subunit E 1                                              | 1   |
| P36578 | 60S ribosomal protein L4                                                      | 2   |
| P36871 | Phosphoglucomutase-1                                                          | 5   |
| P36873 | Serine/threonine-protein phosphatase PP1-gamma catalytic subunit              | 2   |
| P36955 | Pigment epithelium-derived factor                                             | 16  |
| P36980 | Complement factor H-related protein 2                                         | 1   |
| P37235 | Hippocalcin-like protein 1                                                    | 1   |
| P37802 | Transgelin-2                                                                  | 6   |
| P37837 | Transaldolase                                                                 | 1   |
| P37840 | Alpha-synuclein                                                               | 4   |
| P39019 | 40S ribosomal protein S19                                                     | 1   |
| P39023 | 60S ribosomal protein L3                                                      | 2   |
| P39060 | Collagen alpha-1(XVIII) chain                                                 | 15  |
| P39656 | Dolichyl-diphosphooligosaccharide--protein glycosyltransferase 48 kDa subunit | 2   |
| P40197 | Platelet glycoprotein V                                                       | 5   |
| P40227 | T-complex protein 1 subunit zeta                                              | 5   |
| P40925 | "Malate dehydrogenase, cytoplasmic"                                           | 1   |
| P40926 | "Malate dehydrogenase, mitochondrial"                                         | 3   |



|        |                                                                  |   |
|--------|------------------------------------------------------------------|---|
| P40939 | "Trifunctional enzyme subunit alpha, mitochondrial"              | 3 |
| P41091 | Eukaryotic translation initiation factor 2 subunit 3             | 5 |
| P41214 | Eukaryotic translation initiation factor 2D                      | 1 |
| P41218 | Myeloid cell nuclear differentiation antigen                     | 1 |
| P42025 | Beta-centractin                                                  | 2 |
| P42765 | "3-ketoacyl-CoA thiolase, mitochondrial"                         | 4 |
| P42768 | Wiskott-Aldrich syndrome protein                                 | 2 |
| P42892 | Endothelin-converting enzyme 1                                   | 1 |
| P43155 | Carnitine O-acetyltransferase                                    | 1 |
| P43250 | G-protein-coupled receptor kinase 6                              | 3 |
| P43251 | Biotinidase                                                      | 2 |
| P43304 | "Glycerol-3-phosphate dehydrogenase, mitochondrial"              | 2 |
| P43405 | Tyrosine-protein kinase SYK                                      | 6 |
| P43652 | Afamin                                                           | 7 |
| P43686 | 26S proteasome regulatory subunit 6B                             | 2 |
| P45880 | Voltage-dependent anion-selective channel protein 2              | 1 |
| P45974 | Ubiquitin carboxyl-terminal hydrolase 5                          | 1 |
| P46109 | Crk-like protein                                                 | 1 |
| P46778 | 60S ribosomal protein L21                                        | 1 |
| P46781 | 40S ribosomal protein S9                                         | 1 |
| P46783 | 40S ribosomal protein S10                                        | 2 |
| P46940 | Ras GTPase-activating-like protein IQGAP1                        | 2 |
| P47755 | F-actin-capping protein subunit alpha-2                          | 2 |
| P47756 | F-actin-capping protein subunit beta                             | 2 |
| P47985 | "Cytochrome b-c1 complex subunit Rieske, mitochondrial"          | 2 |
| P48047 | "ATP synthase subunit O, mitochondrial"                          | 1 |
| P48059 | LIM and senescent cell antigen-like-containing domain protein 1  | 8 |
| P48061 | Stromal cell-derived factor 1                                    | 3 |
| P48426 | Phosphatidylinositol 5-phosphate 4-kinase type-2 alpha           | 8 |
| P48444 | Coatamer subunit delta                                           | 1 |
| P48643 | T-complex protein 1 subunit epsilon                              | 4 |
| P48729 | Casein kinase I isoform alpha                                    | 2 |
| P48735 | "Isocitrate dehydrogenase [NADP], mitochondrial"                 | 6 |
| P48740 | Mannan-binding lectin serine protease 1                          | 9 |
| P49257 | Protein ERGIC-53                                                 | 4 |
| P49327 | Fatty acid synthase                                              | 1 |
| P49368 | T-complex protein 1 subunit gamma                                | 9 |
| P49407 | Beta-arrestin-1                                                  | 1 |
| P49411 | "Elongation factor Tu, mitochondrial"                            | 2 |
| P49589 | "Cysteine--tRNA ligase, cytoplasmic"                             | 1 |
| P49591 | "Serine--tRNA ligase, cytoplasmic"                               | 2 |
| P49641 | Alpha-mannosidase 2x                                             | 2 |
| P49720 | Proteasome subunit beta type-3                                   | 1 |
| P49721 | Proteasome subunit beta type-2                                   | 1 |
| P49748 | "Very long-chain specific acyl-CoA dehydrogenase, mitochondrial" | 3 |
| P49755 | Transmembrane emp24 domain-containing protein 10                 | 1 |
| P49840 | Glycogen synthase kinase-3 alpha                                 | 1 |
| P49841 | Glycogen synthase kinase-3 beta                                  | 1 |

|        |                                                                        |    |
|--------|------------------------------------------------------------------------|----|
| P49862 | Kallikrein-7                                                           | 2  |
| P49908 | Selenoprotein P                                                        | 12 |
| P49913 | Cathelicidin antimicrobial peptide                                     | 8  |
| P50148 | Guanine nucleotide-binding protein G(q) subunit alpha                  | 2  |
| P50225 | Sulfotransferase 1A1                                                   | 1  |
| P50238 | Cysteine-rich protein 1                                                | 1  |
| P50454 | Serpin H1                                                              | 1  |
| P50502 | Hsc70-interacting protein                                              | 2  |
| P50552 | Vasodilator-stimulated phosphoprotein                                  | 8  |
| P50570 | Dynamin-2                                                              | 2  |
| P50579 | Methionine aminopeptidase 2                                            | 3  |
| P50990 | T-complex protein 1 subunit theta                                      | 1  |
| P50991 | T-complex protein 1 subunit delta                                      | 1  |
| P50995 | Annexin A11                                                            | 2  |
| P51149 | Ras-related protein Rab-7a                                             | 2  |
| P51452 | Dual specificity protein phosphatase 3                                 | 1  |
| P51571 | Translocon-associated protein subunit delta                            | 1  |
| P51572 | B-cell receptor-associated protein 31                                  | 4  |
| P51575 | P2X purinoceptor 1                                                     | 1  |
| P51659 | Peroxisomal multifunctional enzyme type 2                              | 4  |
| P51665 | 26S proteasome non-ATPase regulatory subunit 7                         | 2  |
| P51812 | Ribosomal protein S6 kinase alpha-3                                    | 2  |
| P51858 | Hepatoma-derived growth factor                                         | 1  |
| P51884 | Lumican                                                                | 7  |
| P51888 | Prolargin                                                              | 4  |
| P51991 | Heterogeneous nuclear ribonucleoprotein A3                             | 3  |
| P52209 | "6-phosphogluconate dehydrogenase, decarboxylating"                    | 4  |
| P52272 | Heterogeneous nuclear ribonucleoprotein M                              | 1  |
| P52565 | Rho GDP-dissociation inhibitor 1                                       | 1  |
| P52566 | Rho GDP-dissociation inhibitor 2                                       | 1  |
| P52907 | F-actin-capping protein subunit alpha-1                                | 6  |
| P53004 | Biliverdin reductase A                                                 | 1  |
| P53396 | ATP-citrate synthase                                                   | 1  |
| P53597 | "Succinate--CoA ligase [ADP/GDP-forming] subunit alpha, mitochondrial" | 1  |
| P53618 | Coatomer subunit beta                                                  | 2  |
| P53621 | Coatomer subunit alpha                                                 | 1  |
| P53634 | Dipeptidyl peptidase 1                                                 | 3  |
| P53680 | AP-2 complex subunit sigma                                             | 1  |
| P53990 | IST1 homolog                                                           | 2  |
| P54136 | "Arginine--tRNA ligase, cytoplasmic"                                   | 2  |
| P54368 | Ornithine decarboxylase antizyme 1                                     | 1  |
| P54577 | "Tyrosine--tRNA ligase, cytoplasmic"                                   | 4  |
| P54578 | Ubiquitin carboxyl-terminal hydrolase 14                               | 2  |
| P54709 | Sodium/potassium-transporting ATPase subunit beta-3                    | 1  |
| P54819 | "Adenylate kinase 2, mitochondrial"                                    | 1  |
| P54920 | Alpha-soluble NSF attachment protein                                   | 1  |
| P55010 | Eukaryotic translation initiation factor 5                             | 4  |
| P55036 | 26S proteasome non-ATPase regulatory subunit 4                         | 1  |

|        |                                                                   |    |
|--------|-------------------------------------------------------------------|----|
| P55056 | Apolipoprotein C-IV                                               | 9  |
| P55058 | Phospholipid transfer protein                                     | 18 |
| P55060 | Exportin-2                                                        | 1  |
| P55072 | Transitional endoplasmic reticulum ATPase                         | 5  |
| P55084 | "Trifunctional enzyme subunit beta, mitochondrial"                | 3  |
| P55103 | Inhibin beta C chain                                              | 5  |
| P55145 | Mesencephalic astrocyte-derived neurotrophic factor               | 7  |
| P55209 | Nucleosome assembly protein 1-like 1                              | 4  |
| P55773 | C-C motif chemokine 23                                            | 1  |
| P55774 | C-C motif chemokine 18                                            | 2  |
| P55809 | "Succinyl-CoA:3-ketoacid coenzyme A transferase 1, mitochondrial" | 1  |
| P56211 | cAMP-regulated phosphoprotein 19                                  | 1  |
| P56385 | "ATP synthase subunit e, mitochondrial"                           | 1  |
| P56556 | NADH dehydrogenase [ubiquinone] 1 alpha subcomplex subunit 6      | 1  |
| P58166 | Inhibin beta E chain                                              | 9  |
| P58335 | Anthrax toxin receptor 2                                          | 4  |
| P58546 | Myotrophin                                                        | 2  |
| P59665 | Neutrophil defensin 1                                             | 1  |
| P59768 | Guanine nucleotide-binding protein G(I)/G(S)/G(O) subunit gamma-2 | 1  |
| P59998 | Actin-related protein 2/3 complex subunit 4                       | 2  |
| P60174 | Triosephosphate isomerase                                         | 1  |
| P60660 | Myosin light polypeptide 6                                        | 7  |
| P60709 | "Actin, cytoplasmic 1"                                            | 25 |
| P60866 | 40S ribosomal protein S20                                         | 2  |
| P60891 | Ribose-phosphate pyrophosphokinase 1                              | 2  |
| P60900 | Proteasome subunit alpha type-6                                   | 1  |
| P60903 | Protein S100-A10                                                  | 2  |
| P60953 | Cell division control protein 42 homolog                          | 5  |
| P60981 | Dextrin                                                           | 1  |
| P60985 | Keratinocyte differentiation-associated protein                   | 6  |
| P61006 | Ras-related protein Rab-8A                                        | 2  |
| P61019 | Ras-related protein Rab-2A                                        | 1  |
| P61020 | Ras-related protein Rab-5B                                        | 1  |
| P61026 | Ras-related protein Rab-10                                        | 2  |
| P61106 | Ras-related protein Rab-14                                        | 4  |
| P61158 | Actin-related protein 3                                           | 6  |
| P61160 | Actin-related protein 2                                           | 4  |
| P61204 | ADP-ribosylation factor 3                                         | 2  |
| P61224 | Ras-related protein Rap-1b                                        | 4  |
| P61247 | 40S ribosomal protein S3a                                         | 2  |
| P61313 | 60S ribosomal protein L15                                         | 1  |
| P61353 | 60S ribosomal protein L27                                         | 1  |
| P61586 | Transforming protein RhoA                                         | 6  |
| P61604 | "10 kDa heat shock protein, mitochondrial"                        | 2  |
| P61626 | Lysozyme C                                                        | 7  |
| P61769 | Beta-2-microglobulin                                              | 4  |
| P61978 | Heterogeneous nuclear ribonucleoprotein K                         | 6  |
| P61981 | 14-3-3 protein gamma                                              | 4  |

|        |                                                                   |    |
|--------|-------------------------------------------------------------------|----|
| P62191 | 26S proteasome regulatory subunit 4                               | 2  |
| P62195 | 26S proteasome regulatory subunit 8                               | 2  |
| P62249 | 40S ribosomal protein S16                                         | 1  |
| P62258 | 14-3-3 protein epsilon                                            | 3  |
| P62269 | 40S ribosomal protein S18                                         | 1  |
| P62314 | Small nuclear ribonucleoprotein Sm D1                             | 1  |
| P62316 | Small nuclear ribonucleoprotein Sm D2                             | 1  |
| P62328 | Thymosin beta-4                                                   | 5  |
| P62330 | ADP-ribosylation factor 6                                         | 3  |
| P62333 | 26S proteasome regulatory subunit 10B                             | 2  |
| P62495 | Eukaryotic peptide chain release factor subunit 1                 | 2  |
| P62805 | Histone H4                                                        | 8  |
| P62826 | GTP-binding nuclear protein Ran                                   | 9  |
| P62834 | Ras-related protein Rap-1A                                        | 1  |
| P62847 | 40S ribosomal protein S24                                         | 1  |
| P62873 | Guanine nucleotide-binding protein G(I)/G(S)/G(T) subunit beta-1  | 2  |
| P62879 | Guanine nucleotide-binding protein G(I)/G(S)/G(T) subunit beta-2  | 2  |
| P62917 | 60S ribosomal protein L8                                          | 1  |
| P62937 | Peptidyl-prolyl cis-trans isomerase A                             | 7  |
| P62942 | Peptidyl-prolyl cis-trans isomerase FKBP1A                        | 1  |
| P63000 | Ras-related C3 botulinum toxin substrate 1                        | 1  |
| P63010 | AP-2 complex subunit beta                                         | 2  |
| P63104 | 14-3-3 protein zeta/delta                                         | 7  |
| P63167 | "Dynein light chain 1, cytoplasmic"                               | 1  |
| P63218 | Guanine nucleotide-binding protein G(I)/G(S)/G(O) subunit gamma-5 | 1  |
| P63241 | Eukaryotic translation initiation factor 5A-1                     | 5  |
| P63244 | Receptor of activated protein C-kinase 1                          | 1  |
| P63261 | "Actin, cytoplasmic 2"                                            | 1  |
| P67936 | Tropomyosin alpha-4 chain                                         | 6  |
| P68032 | "Actin, alpha cardiac muscle 1"                                   | 5  |
| P68036 | Ubiquitin-conjugating enzyme E2 L3                                | 3  |
| P68104 | Elongation factor 1-alpha 1                                       | 8  |
| P68363 | Tubulin alpha-1B chain                                            | 11 |
| P68366 | Tubulin alpha-4A chain                                            | 1  |
| P68371 | Tubulin beta-4B chain                                             | 11 |
| P68431 | Histone H3.1                                                      | 2  |
| P68871 | Hemoglobin subunit beta                                           | 15 |
| P69905 | Hemoglobin subunit alpha                                          | 21 |
| P78371 | T-complex protein 1 subunit beta                                  | 10 |
| P78417 | Glutathione S-transferase omega-1                                 | 5  |
| P78509 | Reelin                                                            | 5  |
| P78539 | Sushi repeat-containing protein SRPX                              | 1  |
| P80108 | Phosphatidylinositol-glycan-specific phospholipase D              | 13 |
| P80188 | Neutrophil gelatinase-associated lipocalin                        | 2  |
| P80303 | Nucleobindin-2                                                    | 1  |
| P80511 | Protein S100-A12                                                  | 1  |
| P80723 | Brain acid soluble protein 1                                      | 2  |
| P80748 | Immunoglobulin lambda variable 3-21                               | 1  |

|        |                                                                               |    |
|--------|-------------------------------------------------------------------------------|----|
| P81605 | Dermcidin                                                                     | 2  |
| P84085 | ADP-ribosylation factor 5                                                     | 1  |
| P84095 | Rho-related GTP-binding protein RhoG                                          | 1  |
| P84103 | Serine/arginine-rich splicing factor 3                                        | 1  |
| P84243 | Histone H3.3                                                                  | 1  |
| P98160 | Basement membrane-specific heparan-sulfate proteoglycan core protein          | 2  |
| P99999 | Cytochrome c                                                                  | 1  |
| Q00013 | 55 kDa erythrocyte membrane protein                                           | 5  |
| Q00325 | "Phosphate carrier protein, mitochondrial"                                    | 1  |
| Q00341 | Vigilin                                                                       | 1  |
| Q00577 | Transcriptional activator protein Pur-alpha                                   | 1  |
| Q00610 | Clathrin heavy chain 1                                                        | 5  |
| Q00688 | Peptidyl-prolyl cis-trans isomerase FKBP3                                     | 1  |
| Q00765 | Receptor expression-enhancing protein 5                                       | 1  |
| Q00796 | Sorbitol dehydrogenase                                                        | 3  |
| Q01082 | "Spectrin beta chain, nonerythrocytic 1"                                      | 8  |
| Q01433 | AMP deaminase 2                                                               | 1  |
| Q01518 | Adenylyl cyclase-associated protein 1                                         | 12 |
| Q01813 | "ATP-dependent 6-phosphofructokinase, platelet type"                          | 1  |
| Q01970 | "1-phosphatidylinositol 4,5-bisphosphate phosphodiesterase beta-3"            | 2  |
| Q02108 | Guanylate cyclase soluble subunit alpha-1                                     | 1  |
| Q02413 | Desmoglein-1                                                                  | 4  |
| Q02818 | Nucleobindin-1                                                                | 2  |
| Q02878 | 60S ribosomal protein L6                                                      | 2  |
| Q02985 | Complement factor H-related protein 3                                         | 1  |
| Q03519 | Antigen peptide transporter 2                                                 | 2  |
| Q03591 | Complement factor H-related protein 1                                         | 16 |
| Q04637 | Eukaryotic translation initiation factor 4 gamma 1                            | 2  |
| Q04756 | Hepatocyte growth factor activator                                            | 12 |
| Q04917 | 14-3-3 protein eta                                                            | 2  |
| Q05397 | Focal adhesion kinase 1                                                       | 1  |
| Q05682 | Caldesmon                                                                     | 13 |
| Q05707 | Collagen alpha-1(XIV) chain                                                   | 4  |
| Q06033 | Inter-alpha-trypsin inhibitor heavy chain H3                                  | 22 |
| Q06187 | Tyrosine-protein kinase BTK                                                   | 3  |
| Q06830 | Peroxiredoxin-1                                                               | 2  |
| Q07020 | 60S ribosomal protein L18                                                     | 2  |
| Q07021 | "Complement component 1 Q subcomponent-binding protein, mitochondrial"        | 1  |
| Q07666 | "KH domain-containing, RNA-binding, signal transduction-associated protein 1" | 1  |
| Q07954 | Prolow-density lipoprotein receptor-related protein 1                         | 5  |
| Q07960 | Rho GTPase-activating protein 1                                               | 1  |
| Q08188 | Protein-glutamine gamma-glutamyltransferase E                                 | 2  |
| Q08209 | Protein phosphatase 3 catalytic subunit alpha                                 | 1  |
| Q08211 | ATP-dependent RNA helicase A                                                  | 3  |
| Q08257 | Quinone oxidoreductase                                                        | 1  |
| Q08380 | Galectin-3-binding protein                                                    | 5  |
| Q08495 | Dematin                                                                       | 4  |
| Q08554 | Desmocollin-1                                                                 | 5  |

|        |                                                                           |    |
|--------|---------------------------------------------------------------------------|----|
| Q08722 | Leukocyte surface antigen CD47                                            | 1  |
| Q08830 | Fibrinogen-like protein 1                                                 | 1  |
| Q09328 | "Alpha-1,6-mannosylglycoprotein 6-beta-N-acetylglucosaminyltransferase A" | 1  |
| Q09666 | Neuroblast differentiation-associated protein AHNAK                       | 4  |
| Q0VDG4 | Secernin-3                                                                | 1  |
| Q0ZGT2 | Nexilin                                                                   | 1  |
| Q10567 | AP-1 complex subunit beta-1                                               | 1  |
| Q12797 | Aspartyl/asparaginy l beta-hydroxylase                                    | 4  |
| Q12805 | EGF-containing fibulin-like extracellular matrix protein 1                | 2  |
| Q12904 | Aminoacyl tRNA synthase complex-interacting multifunctional protein 1     | 2  |
| Q12905 | Interleukin enhancer-binding factor 2                                     | 3  |
| Q12906 | Interleukin enhancer-binding factor 3                                     | 12 |
| Q12913 | Receptor-type tyrosine-protein phosphatase eta                            | 5  |
| Q12974 | Protein tyrosine phosphatase type IVA 2                                   | 1  |
| Q13011 | "Delta(3,5)-Delta(2,4)-dienoyl-CoA isomerase, mitochondrial"              | 1  |
| Q13045 | Protein flightless-1 homolog                                              | 5  |
| Q13057 | Bifunctional coenzyme A synthase                                          | 1  |
| Q13093 | Platelet-activating factor acetylhydrolase                                | 4  |
| Q13094 | Lymphocyte cytosolic protein 2                                            | 3  |
| Q13103 | Secreted phosphoprotein 24                                                | 6  |
| Q13144 | Translation initiation factor eIF-2B subunit epsilon                      | 1  |
| Q13162 | Peroxiredoxin-4                                                           | 2  |
| Q13177 | Serine/threonine-protein kinase PAK 2                                     | 2  |
| Q13200 | 26S proteasome non-ATPase regulatory subunit 2                            | 4  |
| Q13201 | Multimerin-1                                                              | 38 |
| Q13214 | Semaphorin-3B                                                             | 2  |
| Q13217 | DnaJ homolog subfamily C member 3                                         | 8  |
| Q13418 | Integrin-linked protein kinase                                            | 10 |
| Q13423 | "NAD(P) transhydrogenase, mitochondrial"                                  | 1  |
| Q13442 | 28 kDa heat- and acid-stable phosphoprotein                               | 1  |
| Q13459 | Unconventional myosin-IXb                                                 | 1  |
| Q13464 | Rho-associated protein kinase 1                                           | 1  |
| Q13469 | "Nuclear factor of activated T-cells, cytoplasmic 2"                      | 1  |
| Q13492 | Phosphatidylinositol-binding clathrin assembly protein                    | 2  |
| Q13510 | Acid ceramidase                                                           | 1  |
| Q13526 | Peptidyl-prolyl cis-trans isomerase NIMA-interacting 1                    | 2  |
| Q13555 | Calcium/calmodulin-dependent protein kinase type II subunit gamma         | 1  |
| Q13557 | Calcium/calmodulin-dependent protein kinase type II subunit delta         | 1  |
| Q13561 | Dynactin subunit 2                                                        | 1  |
| Q13576 | Ras GTPase-activating-like protein IQGAP2                                 | 4  |
| Q13586 | Stromal interaction molecule 1                                            | 2  |
| Q13609 | Deoxyribonuclease gamma                                                   | 1  |
| Q13617 | Cullin-2                                                                  | 1  |
| Q13642 | Four and a half LIM domains protein 1                                     | 2  |
| Q13724 | Mannosyl-oligosaccharide glucosidase                                      | 1  |
| Q13740 | CD166 antigen                                                             | 1  |
| Q13790 | Apolipoprotein F                                                          | 2  |
| Q13822 | Ectonucleotide pyrophosphatase/phosphodiesterase family member 2          | 5  |

|        |                                                                                 |    |
|--------|---------------------------------------------------------------------------------|----|
| Q13867 | Bleomycin hydrolase                                                             | 1  |
| Q14008 | Cytoskeleton-associated protein 5                                               | 4  |
| Q14103 | Heterogeneous nuclear ribonucleoprotein D0                                      | 3  |
| Q14141 | Septin-6                                                                        | 2  |
| Q14152 | Eukaryotic translation initiation factor 3 subunit A                            | 1  |
| Q14165 | Malectin                                                                        | 1  |
| Q14166 | Tubulin--tyrosine ligase-like protein 12                                        | 1  |
| Q14203 | Dynactin subunit 1                                                              | 1  |
| Q14204 | Cytoplasmic dynein 1 heavy chain 1                                              | 1  |
| Q14213 | Interleukin-27 subunit beta                                                     | 1  |
| Q14240 | Eukaryotic initiation factor 4A-II                                              | 1  |
| Q14247 | Src substrate cortactin                                                         | 2  |
| Q14254 | Flotillin-2                                                                     | 3  |
| Q14314 | Fibroleukin                                                                     | 2  |
| Q14315 | Filamin-C                                                                       | 1  |
| Q14344 | Guanine nucleotide-binding protein subunit alpha-13                             | 2  |
| Q14520 | Hyaluronan-binding protein 2                                                    | 30 |
| Q14554 | Protein disulfide-isomerase A5                                                  | 5  |
| Q14574 | Desmocollin-3                                                                   | 7  |
| Q14624 | Inter-alpha-trypsin inhibitor heavy chain H4                                    | 69 |
| Q14644 | Ras GTPase-activating protein 3                                                 | 4  |
| Q14696 | LRP chaperone MESD                                                              | 2  |
| Q14697 | Neutral alpha-glucosidase AB                                                    | 12 |
| Q14738 | Serine/threonine-protein phosphatase 2A 56 kDa regulatory subunit delta isoform | 1  |
| Q14766 | Latent-transforming growth factor beta-binding protein 1                        | 21 |
| Q14847 | LIM and SH3 domain protein 1                                                    | 3  |
| Q14956 | Transmembrane glycoprotein NMB                                                  | 1  |
| Q15008 | 26S proteasome non-ATPase regulatory subunit 6                                  | 1  |
| Q15019 | Septin-2                                                                        | 2  |
| Q15063 | Periostin                                                                       | 9  |
| Q15075 | Early endosome antigen 1                                                        | 1  |
| Q15084 | Protein disulfide-isomerase A6                                                  | 1  |
| Q15109 | Advanced glycosylation end product-specific receptor                            | 1  |
| Q15113 | Procollagen C-endopeptidase enhancer 1                                          | 23 |
| Q15149 | Plectin                                                                         | 7  |
| Q15155 | Nodal modulator 1                                                               | 1  |
| Q15166 | Serum paraoxonase/lactonase 3                                                   | 3  |
| Q15181 | Inorganic pyrophosphatase                                                       | 1  |
| Q15365 | Poly(rC)-binding protein 1                                                      | 1  |
| Q15386 | Ubiquitin-protein ligase E3C                                                    | 1  |
| Q15404 | Ras suppressor protein 1                                                        | 9  |
| Q15436 | Protein transport protein Sec23A                                                | 1  |
| Q15485 | Ficolin-2                                                                       | 3  |
| Q15555 | Microtubule-associated protein RP/EB family member 2                            | 7  |
| Q15582 | Transforming growth factor-beta-induced protein ig-h3                           | 34 |
| Q15691 | Microtubule-associated protein RP/EB family member 1                            | 5  |
| Q15746 | "Myosin light chain kinase, smooth muscle"                                      | 1  |
| Q15833 | Syntaxin-binding protein 2                                                      | 11 |

|        |                                                                                           |    |
|--------|-------------------------------------------------------------------------------------------|----|
| Q15848 | Adiponectin                                                                               | 1  |
| Q15904 | V-type proton ATPase subunit S1                                                           | 1  |
| Q15907 | Ras-related protein Rab-11B                                                               | 2  |
| Q15942 | Zyxin                                                                                     | 8  |
| Q16181 | Septin-7                                                                                  | 7  |
| Q16270 | Insulin-like growth factor-binding protein 7                                              | 7  |
| Q16401 | 26S proteasome non-ATPase regulatory subunit 5                                            | 1  |
| Q16555 | Dihydropyrimidinase-related protein 2                                                     | 2  |
| Q16610 | Extracellular matrix protein 1                                                            | 5  |
| Q16627 | C-C motif chemokine 14                                                                    | 4  |
| Q16643 | Drebrin                                                                                   | 2  |
| Q16674 | Melanoma-derived growth regulatory protein                                                | 1  |
| Q16698 | "2,4-dienoyl-CoA reductase [(3E)-enoyl-CoA-producing], mitochondrial"                     | 1  |
| Q16775 | "Hydroxyacylglutathione hydrolase, mitochondrial"                                         | 1  |
| Q16799 | Reticulon-1                                                                               | 1  |
| Q16836 | "Hydroxyacyl-coenzyme A dehydrogenase, mitochondrial"                                     | 1  |
| Q27J81 | Inverted formin-2                                                                         | 7  |
| Q3LXA3 | Triokinase/FMN cyclase                                                                    | 3  |
| Q4LDE5 | "Sushi, von Willebrand factor type A, EGF and pentraxin domain-containing protein 3<br>1" | 3  |
| Q53EL6 | Programmed cell death protein 4                                                           | 1  |
| Q53H76 | Phospholipase A1 member A                                                                 | 8  |
| Q53RD9 | Fibulin-7                                                                                 | 3  |
| Q59EK9 | RUN domain-containing protein 3A                                                          | 1  |
| Q5D862 | Filaggrin-2                                                                               | 6  |
| Q5JSH3 | WD repeat-containing protein 44                                                           | 3  |
| Q5SQ64 | Lymphocyte antigen 6 complex locus protein G6f                                            | 1  |
| Q5SW79 | Centrosomal protein of 170 kDa                                                            | 1  |
| Q5T0F9 | Coiled-coil and C2 domain-containing protein 1B                                           | 1  |
| Q5T749 | Keratinocyte proline-rich protein                                                         | 2  |
| Q5TEC6 | Histone H3-7                                                                              | 1  |
| Q5XPI4 | E3 ubiquitin-protein ligase RNF123                                                        | 1  |
| Q66K74 | Microtubule-associated protein 1S                                                         | 1  |
| Q6DD88 | Atlastin-3                                                                                | 1  |
| Q6E0U4 | Dermokine                                                                                 | 3  |
| Q6IBS0 | Twinfilin-2                                                                               | 3  |
| Q6N069 | "N-alpha-acetyltransferase 16, NatA auxiliary subunit"                                    | 1  |
| Q6NUJ1 | Proactivator polypeptide-like 1                                                           | 1  |
| Q6P988 | Palmitoleoyl-protein carboxylesterase NOTUM                                               | 1  |
| Q6Q788 | Apolipoprotein A-V                                                                        | 21 |
| Q6UWF9 | Protein FAM180A                                                                           | 1  |
| Q6UWL2 | Sushi domain-containing protein 1                                                         | 1  |
| Q6UWP8 | Suprabasin                                                                                | 11 |
| Q6UWY5 | Olfactomedin-like protein 1                                                               | 3  |
| Q6UX71 | Plexin domain-containing protein 2                                                        | 4  |
| Q6UXF1 | Transmembrane protein 108                                                                 | 1  |
| Q6UXH0 | Angiopoietin-like protein 8                                                               | 2  |
| Q6UXH9 | Inactive serine protease PAMR1                                                            | 1  |



|        |                                                                |    |
|--------|----------------------------------------------------------------|----|
| Q6UXI7 | Vitrin                                                         | 1  |
| Q6UXI9 | Nephronectin                                                   | 9  |
| Q6UY14 | ADAMTS-like protein 4                                          | 9  |
| Q6WN34 | Chordin-like protein 2                                         | 2  |
| Q6YHK3 | CD109 antigen                                                  | 3  |
| Q6ZN30 | Zinc finger protein basonuclin-2                               | 1  |
| Q6ZVM7 | TOM1-like protein 2                                            | 1  |
| Q6ZWK6 | Transmembrane protease serine 11F                              | 1  |
| Q709C8 | Intermembrane lipid transfer protein VPS13C                    | 2  |
| Q70J99 | Protein unc-13 homolog D                                       | 4  |
| Q7KZF4 | Staphylococcal nuclease domain-containing protein 1            | 1  |
| Q7L1Q6 | eIF5-mimic protein 2                                           | 2  |
| Q7L576 | Cytoplasmic FMR1-interacting protein 1                         | 2  |
| Q7L591 | Docking protein 3                                              | 2  |
| Q7L9L4 | MOB kinase activator 1B                                        | 1  |
| Q7LDG7 | RAS guanyl-releasing protein 2                                 | 8  |
| Q7Z3V4 | Ubiquitin-protein ligase E3B                                   | 2  |
| Q7Z434 | Mitochondrial antiviral-signaling protein                      | 1  |
| Q7Z4P5 | Growth/differentiation factor 7                                | 1  |
| Q7Z4W1 | L-xylulose reductase                                           | 1  |
| Q7Z5L7 | Podocan                                                        | 1  |
| Q7Z794 | "Keratin, type II cytoskeletal 1b"                             | 2  |
| Q7Z7G0 | Target of Nesh-SH3                                             | 4  |
| Q7Z7H5 | Transmembrane emp24 domain-containing protein 4                | 1  |
| Q86TH1 | ADAMTS-like protein 2                                          | 1  |
| Q86U17 | Serpin A11                                                     | 1  |
| Q86UD1 | Out at first protein homolog                                   | 1  |
| Q86UX2 | Inter-alpha-trypsin inhibitor heavy chain H5                   | 1  |
| Q86UX7 | Fermitin family homolog 3                                      | 27 |
| Q86VP6 | Cullin-associated NEDD8-dissociated protein 1                  | 6  |
| Q86WI1 | Fibrocystin-L                                                  | 1  |
| Q86X29 | Lipolysis-stimulated lipoprotein receptor                      | 1  |
| Q86Y46 | "Keratin, type II cytoskeletal 73"                             | 1  |
| Q86YW5 | Trem-like transcript 1 protein                                 | 5  |
| Q86YZ3 | Hornerin                                                       | 10 |
| Q8IUD2 | ELKS/Rab6-interacting/CAST family member 1                     | 1  |
| Q8IUI8 | Cytokine receptor-like factor 3                                | 1  |
| Q8IUX7 | Adipocyte enhancer-binding protein 1                           | 1  |
| Q8IW75 | Serpin A12                                                     | 1  |
| Q8IWU5 | Extracellular sulfatase Sulf-2                                 | 4  |
| Q8IWY4 | "Signal peptide, CUB and EGF-like domain-containing protein 1" | 3  |
| Q8IXL6 | Extracellular serine/threonine-protein kinase FAM20C           | 1  |
| Q8IYB3 | Serine/arginine repetitive matrix protein 1                    | 1  |
| Q8IYI6 | Exocyst complex component 8                                    | 1  |
| Q8IZ83 | Aldehyde dehydrogenase family 16 member A1                     | 1  |
| Q8IZP0 | Abl interactor 1                                               | 2  |
| Q8NIG4 | Leucine-rich repeat-containing protein 47                      | 4  |
| Q8NIN4 | "Keratin, type II cytoskeletal 78"                             | 4  |

|        |                                                            |    |
|--------|------------------------------------------------------------|----|
| Q8N392 | Rho GTPase-activating protein 18                           | 1  |
| Q8N474 | Secreted frizzled-related protein 1                        | 1  |
| Q8N699 | Myc target protein 1                                       | 1  |
| Q8NBP7 | Proprotein convertase subtilisin/kexin type 9              | 4  |
| Q8NC51 | Plasminogen activator inhibitor 1 RNA-binding protein      | 2  |
| Q8NCH0 | Carbohydrate sulfotransferase 14                           | 3  |
| Q8NDC0 | MAPK-interacting and spindle-stabilizing protein-like      | 1  |
| Q8NDZ4 | Divergent protein kinase domain 2A                         | 5  |
| Q8NE71 | ATP-binding cassette subfamily F member 1                  | 2  |
| Q8NE86 | "Calcium uniporter protein, mitochondrial"                 | 1  |
| Q8NES3 | "Beta-1,3-N-acetylglucosaminyltransferase lunatic fringe"  | 1  |
| Q8NET6 | Carbohydrate sulfotransferase 13                           | 1  |
| Q8NEX9 | Short-chain dehydrogenase/reductase family 9C member 7     | 1  |
| Q8NFW8 | N-acylneuraminase cytidyltransferase                       | 1  |
| Q8NI99 | Angiopoietin-related protein 6                             | 5  |
| Q8TB73 | Protein NDNF                                               | 1  |
| Q8TBX8 | Phosphatidylinositol 5-phosphate 4-kinase type-2 gamma     | 1  |
| Q8TC12 | Retinol dehydrogenase 11                                   | 1  |
| Q8TCD5 | "5'(3)-deoxyribonucleotidase, cytosolic type"              | 1  |
| Q8TDL5 | BPI fold-containing family B member 1                      | 4  |
| Q8TE73 | Dynein axonemal heavy chain 5                              | 1  |
| Q8TEA8 | D-aminoacyl-tRNA deacylase 1                               | 1  |
| Q8TER0 | "Sushi, nidogen and EGF-like domain-containing protein 1"  | 9  |
| Q8TF42 | Ubiquitin-associated and SH3 domain-containing protein B   | 1  |
| Q8WTW3 | Conserved oligomeric Golgi complex subunit 1               | 1  |
| Q8WUA8 | Tsukushi                                                   | 3  |
| Q8WUJ3 | Cell migration-inducing and hyaluronan-binding protein     | 9  |
| Q8WUM4 | Programmed cell death 6-interacting protein                | 1  |
| Q8WUW1 | Protein BRICK1                                             | 2  |
| Q8WVM8 | Sec1 family domain-containing protein 1                    | 2  |
| Q8WW22 | DnaJ homolog subfamily A member 4                          | 1  |
| Q8WWA0 | Intellectin-1                                              | 1  |
| Q8WWI5 | Choline transporter-like protein 1                         | 1  |
| Q8WZ42 | Titin                                                      | 3  |
| Q92187 | "CMP-N-acetylneuraminase-poly-alpha-2,8-sialyltransferase" | 1  |
| Q92504 | Zinc transporter SLC39A7                                   | 1  |
| Q92556 | Engulfment and cell motility protein 1                     | 1  |
| Q92608 | Dedicator of cytokinesis protein 2                         | 1  |
| Q92614 | Unconventional myosin-XVIIIa                               | 4  |
| Q92619 | Rho GTPase-activating protein 45                           | 4  |
| Q92626 | Peroxidasin homolog                                        | 11 |
| Q92686 | Neurogranin                                                | 1  |
| Q92743 | Serine protease HTRA1                                      | 7  |
| Q92804 | TATA-binding protein-associated factor 2N                  | 1  |
| Q92820 | Gamma-glutamyl hydrolase                                   | 2  |
| Q92835 | "Phosphatidylinositol 3,4,5-trisphosphate 5-phosphatase 1" | 1  |
| Q92888 | Rho guanine nucleotide-exchange factor 1                   | 2  |
| Q92896 | Golgi apparatus protein 1                                  | 2  |

|        |                                                                              |    |
|--------|------------------------------------------------------------------------------|----|
| Q92954 | Proteoglycan 4                                                               | 58 |
| Q93052 | Lipoma-preferred partner                                                     | 1  |
| Q93084 | Sarcoplasmic/endoplasmic reticulum calcium ATPase 3                          | 6  |
| Q96AG4 | Leucine-rich repeat-containing protein 59                                    | 3  |
| Q96AP7 | Endothelial cell-selective adhesion molecule                                 | 1  |
| Q96AQ6 | Pre-B-cell leukemia transcription factor-interacting protein 1               | 1  |
| Q96BJ3 | "Axin interactor, dorsalization-associated protein"                          | 2  |
| Q96BM9 | ADP-ribosylation factor-like protein 8A                                      | 2  |
| Q96C24 | Synaptotagmin-like protein 4                                                 | 3  |
| Q96CN7 | Isochorismatase domain-containing protein 1                                  | 4  |
| Q96CW1 | AP-2 complex subunit mu                                                      | 1  |
| Q96EE4 | Coiled-coil domain-containing protein 126                                    | 1  |
| Q96GK7 | Fumarylacetoacetate hydrolase domain-containing protein 2A                   | 1  |
| Q96HC4 | PDZ and LIM domain protein 5                                                 | 2  |
| Q96IY4 | Carboxypeptidase B2                                                          | 15 |
| Q96K17 | Transcription factor BTF3 homolog 4                                          | 1  |
| Q96KN2 | Beta-Ala-His dipeptidase                                                     | 10 |
| Q96KP4 | Cytosolic nonspecific dipeptidase                                            | 1  |
| Q96MK2 | RIPOR family member 3                                                        | 1  |
| Q96NZ9 | Proline-rich acidic protein 1                                                | 3  |
| Q96P48 | "Arf-GAP with Rho-GAP domain, ANK repeat and PH domain-containing protein 1" | 2  |
| Q96P63 | Serpin B12                                                                   | 1  |
| Q96PD5 | N-acetylmuramoyl-L-alanine amidase                                           | 19 |
| Q96QR1 | Secretoglobin family 3A member 1                                             | 1  |
| Q96QV6 | Histone H2A type 1-A                                                         | 1  |
| Q96RL7 | Intermembrane lipid transfer protein VPS13A                                  | 1  |
| Q96RP7 | Galactose-3-O-sulfotransferase 4                                             | 1  |
| Q96S96 | Phosphatidylethanolamine-binding protein 4                                   | 2  |
| Q96S97 | Myeloid-associated differentiation marker                                    | 1  |
| Q96SB3 | Neurabin-2                                                                   | 1  |
| Q99439 | Calponin-2                                                                   | 3  |
| Q99460 | 26S proteasome non-ATPase regulatory subunit 1                               | 1  |
| Q99497 | Parkinson disease protein 7                                                  | 3  |
| Q99536 | Synaptic vesicle membrane protein VAT-1 homolog                              | 2  |
| Q99542 | Matrix metalloproteinase-19                                                  | 2  |
| Q99623 | Prohibitin-2                                                                 | 1  |
| Q99653 | Calcineurin B homologous protein 1                                           | 1  |
| Q99685 | Monoglyceride lipase                                                         | 1  |
| Q99714 | 3-hydroxyacyl-CoA dehydrogenase type-2                                       | 1  |
| Q99715 | Collagen alpha-1(XII) chain                                                  | 1  |
| Q99719 | Septin-5                                                                     | 2  |
| Q99729 | Heterogeneous nuclear ribonucleoprotein A/B                                  | 2  |
| Q99733 | Nucleosome assembly protein 1-like 4                                         | 1  |
| Q99784 | Noelin                                                                       | 1  |
| Q99798 | "Aconitate hydratase, mitochondrial"                                         | 2  |
| Q99816 | Tumor susceptibility gene 101 protein                                        | 1  |
| Q99829 | Copine-1                                                                     | 1  |

|        |                                                            |    |
|--------|------------------------------------------------------------|----|
| Q99832 | T-complex protein 1 subunit eta                            | 5  |
| Q99941 | Cyclic AMP-dependent transcription factor ATF-6 beta       | 1  |
| Q99969 | Retinoic acid receptor responder protein 2                 | 9  |
| Q99988 | Growth/differentiation factor 15                           | 4  |
| Q9BPX5 | Actin-related protein 2/3 complex subunit 5-like protein   | 1  |
| Q9BR76 | Coronin-1B                                                 | 1  |
| Q9BRG1 | Vacuolar protein-sorting-associated protein 25             | 1  |
| Q9BS26 | Endoplasmic reticulum resident protein 44                  | 2  |
| Q9BSJ8 | Extended synaptotagmin-1                                   | 2  |
| Q9BU40 | Chordin-like protein 1                                     | 7  |
| Q9BUL8 | Programmed cell death protein 10                           | 1  |
| Q9BUP3 | Oxidoreductase HTATIP2                                     | 1  |
| Q9BVK6 | Transmembrane emp24 domain-containing protein 9            | 1  |
| Q9BW30 | Tubulin polymerization-promoting protein family member 3   | 1  |
| Q9BWD1 | "Acetyl-CoA acetyltransferase, cytosolic"                  | 1  |
| Q9BWM7 | Sideroflexin-3                                             | 1  |
| Q9BWP8 | Collectin-11                                               | 3  |
| Q9BWS9 | Chitinase domain-containing protein 1                      | 9  |
| Q9BXJ4 | Complement C1q tumor necrosis factor-related protein 3     | 2  |
| Q9BXN1 | Asporin                                                    | 16 |
| Q9BXR6 | Complement factor H-related protein 5                      | 12 |
| Q9BY76 | Angiopoietin-related protein 4                             | 4  |
| Q9BYC5 | "Alpha-(1,6)-fucosyltransferase"                           | 2  |
| Q9BYZ8 | Regenerating islet-derived protein 4                       | 2  |
| Q9BZE9 | Tether containing UBX domain for GLUT4                     | 1  |
| Q9C0C9 | (E3-independent) E2 ubiquitin-conjugating enzyme           | 2  |
| Q9GZM7 | Tubulointerstitial nephritis antigen-like                  | 1  |
| Q9H015 | Solute carrier family 22 member 4                          | 2  |
| Q9H098 | Protein FAM107B                                            | 2  |
| Q9H0B8 | Cysteine-rich secretory protein LCCL domain-containing 2   | 2  |
| Q9H0U4 | Ras-related protein Rab-1B                                 | 4  |
| Q9H1E1 | Ribonuclease 7                                             | 1  |
| Q9H299 | SH3 domain-binding glutamic acid-rich-like protein 3       | 1  |
| Q9H2D6 | TRIO and F-actin-binding protein                           | 1  |
| Q9H2G2 | STE20-like serine/threonine-protein kinase                 | 2  |
| Q9H2K8 | Serine/threonine-protein kinase TAO3                       | 1  |
| Q9H2X0 | Chordin                                                    | 1  |
| Q9H444 | Charged multivesicular body protein 4b                     | 2  |
| Q9H4B7 | Tubulin beta-1 chain                                       | 12 |
| Q9H4F8 | SPARC-related modular calcium-binding protein 1            | 4  |
| Q9H4M9 | EH domain-containing protein 1                             | 12 |
| Q9H6X2 | Anthrax toxin receptor 1                                   | 3  |
| Q9H772 | GremLin-2                                                  | 1  |
| Q9H8W4 | Pleckstrin homology domain-containing family F member 2    | 1  |
| Q9H939 | Proline-serine-threonine phosphatase-interacting protein 2 | 6  |
| Q9H9E3 | Conserved oligomeric Golgi complex subunit 4               | 1  |
| Q9HA64 | Ketosamine-3-kinase                                        | 1  |
| Q9HB71 | Calceylin-binding protein                                  | 3  |

|        |                                                              |    |
|--------|--------------------------------------------------------------|----|
| Q9HBI1 | Beta-parvin                                                  | 7  |
| Q9HBL0 | Tensin-1                                                     | 1  |
| Q9HCB6 | Spondin-1                                                    | 5  |
| Q9HCN6 | Platelet glycoprotein VI                                     | 1  |
| Q9HCU4 | Cadherin EGF LAG seven-pass G-type receptor 2                | 2  |
| Q9HDC9 | Adipocyte plasma membrane-associated protein                 | 9  |
| Q9NPA2 | Matrix metalloproteinase-25                                  | 1  |
| Q9NPF2 | Carbohydrate sulfotransferase 11                             | 1  |
| Q9NQ38 | Serine protease inhibitor Kazal-type 5                       | 7  |
| Q9NQ75 | Cas scaffolding protein family member 4                      | 1  |
| Q9NQ79 | Cartilage acidic protein 1                                   | 12 |
| Q9NQC3 | Reticulon-4                                                  | 4  |
| Q9NR09 | Baculoviral IAP repeat-containing protein 6                  | 1  |
| Q9NR45 | Sialic acid synthase                                         | 1  |
| Q9NR99 | Matrix-remodeling-associated protein 5                       | 9  |
| Q9NRA1 | Platelet-derived growth factor C                             | 1  |
| Q9NRB3 | Carbohydrate sulfotransferase 12                             | 3  |
| Q9NRF8 | CTP synthase 2                                               | 1  |
| Q9NRN5 | Olfactomedin-like protein 3                                  | 14 |
| Q9NRV9 | Heme-binding protein 1                                       | 1  |
| Q9NRY5 | Protein FAM114A2                                             | 1  |
| Q9NS84 | Carbohydrate sulfotransferase 7                              | 2  |
| Q9NSD9 | Phenylalanine--tRNA ligase beta subunit                      | 1  |
| Q9NTJ5 | Phosphatidylinositol-3-phosphatase SAC1                      | 1  |
| Q9NTK5 | Obg-like ATPase 1                                            | 6  |
| Q9NUQ9 | CYFIP-related Rac1 interactor B                              | 1  |
| Q9NVA2 | Septin-11                                                    | 1  |
| Q9NX62 | "Golgi-resident adenosine 3',5'-bisphosphate 3'-phosphatase" | 1  |
| Q9NXH8 | Torsin-4A                                                    | 3  |
| Q9NY33 | Dipeptidyl peptidase 3                                       | 1  |
| Q9NYU2 | UDP-glucose:glycoprotein glucosyltransferase 1               | 1  |
| Q9NZ08 | Endoplasmic reticulum aminopeptidase 1                       | 2  |
| Q9NZD2 | Glycolipid transfer protein                                  | 1  |
| Q9NZN3 | EH domain-containing protein 3                               | 13 |
| Q9NZP8 | Complement C1r subcomponent-like protein                     | 1  |
| Q9POL0 | Vesicle-associated membrane protein-associated protein A     | 1  |
| Q9P107 | GEM-interacting protein                                      | 1  |
| Q9P126 | C-type lectin domain family 1 member B                       | 1  |
| Q9P1F3 | Costars family protein ABRACL                                | 3  |
| Q9P1Z2 | Calcium-binding and coiled-coil domain-containing protein 1  | 1  |
| Q9UBQ7 | Glyoxylate reductase/hydroxypyruvate reductase               | 1  |
| Q9UBS3 | DnaJ homolog subfamily B member 9                            | 1  |
| Q9UBS4 | DnaJ homolog subfamily B member 11                           | 3  |
| Q9UBV8 | Peflin                                                       | 1  |
| Q9UBW5 | Bridging integrator 2                                        | 2  |
| Q9UBX5 | Fibulin-5                                                    | 2  |
| Q9UEW3 | Macrophage receptor MARCO                                    | 1  |
| Q9UEW8 | STE20/SPS1-related proline-alanine-rich protein kinase       | 1  |

|        |                                                                            |    |
|--------|----------------------------------------------------------------------------|----|
| Q9UEY8 | Gamma-adducin                                                              | 1  |
| Q9UFP1 | Golgi-associated kinase 1A                                                 | 1  |
| Q9UGM5 | Fetuin-B                                                                   | 3  |
| Q9UHA4 | Ragulator complex protein LAMTOR3                                          | 1  |
| Q9UHB6 | LIM domain and actin-binding protein 1                                     | 1  |
| Q9UHF0 | Tachykinin-3                                                               | 1  |
| Q9UHG3 | Prenylcysteine oxidase 1                                                   | 4  |
| Q9UIQ6 | Leucyl-cystinyl aminopeptidase                                             | 1  |
| Q9UIJ9 | N-acetylglucosamine-1-phosphotransferase subunit gamma                     | 1  |
| Q9UJU6 | Drebrin-like protein                                                       | 2  |
| Q9UJZ1 | "Stomatin-like protein 2, mitochondrial"                                   | 1  |
| Q9UK05 | Growth/differentiation factor 2                                            | 1  |
| Q9UK55 | Protein Z-dependent protease inhibitor                                     | 12 |
| Q9UKV8 | Protein argonaute-2                                                        | 2  |
| Q9UKZ9 | Procollagen C-endopeptidase enhancer 2                                     | 6  |
| Q9UL25 | Ras-related protein Rab-21                                                 | 1  |
| Q9UL46 | Proteasome activator complex subunit 2                                     | 1  |
| Q9ULC4 | Malignant T-cell-amplified sequence 1                                      | 1  |
| Q9ULF5 | Zinc transporter ZIP10                                                     | 3  |
| Q9ULK2 | Ataxin-7-like protein 1                                                    | 1  |
| Q9ULV4 | Coronin-1C                                                                 | 7  |
| Q9UM00 | Calcium load-activated calcium channel                                     | 1  |
| Q9UNF0 | Protein kinase C and casein kinase substrate in neurons protein 2          | 1  |
| Q9UNH7 | Sorting nexin-6                                                            | 1  |
| Q9UNM6 | 26S proteasome non-ATPase regulatory subunit 13                            | 2  |
| Q9UNW1 | Multiple inositol polyphosphate phosphatase 1                              | 3  |
| Q9UQ53 | "Alpha-1,3-mannosyl-glycoprotein 4-beta-N-acetylglucosaminyltransferase B" | 1  |
| Q9UQ80 | Proliferation-associated protein 2G4                                       | 4  |
| Q9Y224 | "RNA transcription, translation and transport factor protein"              | 1  |
| Q9Y251 | Heparanase                                                                 | 8  |
| Q9Y274 | "Type 2 lactosamine alpha-2,3-sialyltransferase"                           | 2  |
| Q9Y277 | Voltage-dependent anion-selective channel protein 3                        | 2  |
| Q9Y287 | Integral membrane protein 2B                                               | 1  |
| Q9Y2A7 | Nck-associated protein 1                                                   | 1  |
| Q9Y2J2 | Band 4.1-like protein 3                                                    | 1  |
| Q9Y2Q3 | Glutathione S-transferase kappa 1                                          | 3  |
| Q9Y333 | U6 snRNA-associated Sm-like protein LSm2                                   | 1  |
| Q9Y371 | Endophilin-B1                                                              | 1  |
| Q9Y394 | Dehydrogenase/reductase SDR family member 7                                | 1  |
| Q9Y3A5 | Ribosome maturation protein SBDS                                           | 3  |
| Q9Y3A6 | Transmembrane emp24 domain-containing protein 5                            | 1  |
| Q9Y3E7 | Charged multivesicular body protein 3                                      | 1  |
| Q9Y3I1 | F-box only protein 7                                                       | 1  |
| Q9Y490 | Talin-1                                                                    | 75 |
| Q9Y4G6 | Talin-2                                                                    | 2  |
| Q9Y4L1 | Hypoxia upregulated protein 1                                              | 7  |
| Q9Y4Y9 | U6 snRNA-associated Sm-like protein LSm5                                   | 1  |
| Q9Y4Z0 | U6 snRNA-associated Sm-like protein LSm4                                   | 2  |

|        |                                                             |    |
|--------|-------------------------------------------------------------|----|
| Q9Y5C1 | Angiopoietin-related protein 3                              | 12 |
| Q9Y5K6 | CD2-associated protein                                      | 3  |
| Q9Y5K8 | V-type proton ATPase subunit D                              | 1  |
| Q9Y5S2 | Serine/threonine-protein kinase MRCK beta                   | 3  |
| Q9Y5X9 | Endothelial lipase                                          | 3  |
| Q9Y613 | FH1/FH2 domain-containing protein 1                         | 1  |
| Q9Y624 | Junctional adhesion molecule A                              | 1  |
| Q9Y678 | Coatomer subunit gamma-1                                    | 1  |
| Q9Y696 | Chloride intracellular channel protein 4                    | 1  |
| Q9Y6C2 | EMILIN-1                                                    | 5  |
| Q9Y6D5 | Brefeldin A-inhibited guanine nucleotide-exchange protein 2 | 1  |
| Q9Y6E0 | Serine/threonine-protein kinase 24                          | 1  |
| Q9Y6G9 | Cytoplasmic dynein 1 light intermediate chain 1             | 1  |
| Q9Y6R7 | IgGfc-binding protein                                       | 2  |
| Q9Y6Z7 | Collectin-10                                                | 1  |

Table 3 of the supplementary data: Baseline characteristics of validation samples

|                                           | LAAT/SEC group n = 58 | Control group (n = 121) | P    |
|-------------------------------------------|-----------------------|-------------------------|------|
| Age, y                                    | 67.7 ± 11.4           | 68.3 ± 10.5             | .710 |
| Male sex                                  | 43 (74.1)             | 80 (66.1)               | .279 |
| Body mass index, kg/m <sup>2</sup>        | 25.8 ± 3.2            | 25.8 ± 3.9              | .973 |
| Smoking                                   | 21 (36.2)             | 48 (39.7)               | .656 |
| Alcohol consumption                       | 18 (31)               | 35 (28.9)               | .772 |
| Heart failure                             | 8 (13.8)              | 17 (14)                 | .963 |
| Hypertension                              | 46 (79.3)             | 88 (72.7)               | .342 |
| Diabetes                                  | 20 (34.5)             | 30 (24.8)               | .176 |
| Past stroke                               | 38 (65.5)             | 69 (57)                 | .278 |
| Hyperlipidemia                            | 12 (20.7)             | 25 (20.7)               | .996 |
| Malignant tumor                           | 3 (5.2)               | 2 (1.7)                 | .394 |
| Coronary heart disease                    | 20 (34.5)             | 58 (47.9)               | .089 |
| Anticoagulation therapy                   | 53 (91.4)             | 106 (87.6)              | .453 |
| Statins                                   | 29 (50)               | 75 (62)                 | .128 |
| Calcium channel blockers                  | 20 (34.5)             | 28 (23.1)               | .109 |
| ACEI/ARB                                  | 26 (44.8)             | 39 (32.2)               | .101 |
| Beta-blockers                             | 46 (79.3)             | 81 (66.9)               | .880 |
| Antiarrhythmic drugs                      | 10 (17.2)             | 7 (5.8)                 | .423 |
| Diuretics                                 | 12 (20.7)             | 20 (16.5)               | .497 |
| CHA2DS2-VASc                              | 3.2 ± 1.2             | 2.7 ± 1.6               | .019 |
| HAS-BLED                                  | 3 ± 1.6               | 3.3 ± 1.5               | .234 |
| White blood cell count, x 10 <sup>9</sup> | 6.3 ± 1.9             | 6.3 ± 2.1               | .895 |
| Red blood cell count, x 10 <sup>12</sup>  | 4.5 ± 0.7             | 4.5 ± 0.6               | .644 |
| Hemoglobin, g/L                           | 136.3 ± 12.4          | 132.8 ± 18.7            | .134 |
| Platelet count, x10 <sup>9</sup>          | 201.8 ± 63.9          | 200.4 ± 49.5            | .866 |
| Red blood cell distribution width         | 12.8 ± 0.8            | 12.8 ± 0.8              | .958 |
| Blood urea nitrogen, mmol/L               | 5.9 ± 2.3             | 6.3 ± 3                 | .403 |
| Blood creatinine, umol/L                  | 85.6 ± 22.4           | 95.1 ± 68.4             | .305 |
| Potassium, K+, mmol/L                     | 3.9 ± 0.3             | 3.9 ± 0.2               | .800 |
| Sodium, Na+, mmol/L                       | 140.4 ± 1.7           | 140.5 ± 1.7             | .840 |
| Chloride, Cl-, mmol/L                     | 105.7 ± 2.1           | 106.7 ± 2.5             | .157 |
| Calcium, Ca <sup>2+</sup> , mmol/L        | 2.3 ± 0.1             | 2.3 ± 0.1               | .495 |
| Alanine aminotransferase, U/L             | 22.8 ± 13             | 20.6 ± 14               | .311 |
| Aspartate aminotransferase, U/L           | 22.1 ± 7.3            | 20.3 ± 8.5              | .158 |
| Total cholesterol, mmol/L                 | 3.9 ± 0.9             | 3.9 ± 0.8               | .881 |
| Triglycerides, mmol/L                     | 1.4 ± 0.7             | 1.2 ± 0.5               | .443 |



|                                  |                 |               |        |
|----------------------------------|-----------------|---------------|--------|
| <i>HDL-C, mmol/L</i>             | 1.3 ± 0.3       | 1.2 ± 0.4     | .491   |
| <i>LDL-C, mmol/L</i>             | 2.1 ± 0.6       | 2.1 ± 0.6     | .705   |
| <i>PT, s</i>                     | 13.1 ± 3.8      | 13.6 ± 3.5    | .649   |
| <i>INR</i>                       | 1.2 ± 0.4       | 1.2 ± 0.3     | .687   |
| <i>Fibrinogen, g/L</i>           | 3.4 ± 1         | 3.2 ± 0.8     | .173   |
| <i>APTT, s</i>                   | 38.3 ± 11.4     | 39.2 ± 8.8    | .565   |
| <i>D-dimer, ng/mL</i>            | 92.8 ± 78       | 67.9 ± 55.9   | .223   |
| <i>NT-proBNP, pg/mL</i>          | 1500.4 ± 1573.7 | 1289 ± 2277.9 | .540   |
| <i>Troponin I, pg/mL</i>         | 3.137 ± 3.361   | 2.343 ± 1.958 | .123   |
| <i>LAD, mm</i>                   | 47.0 ± 9.5      | 42.3 ± 7.6    | .001   |
| <i>LVEF, %</i>                   | 56.0 ± 7.2      | 58.3 ± 8.1    | .068   |
| <i>LAAFV, m/s</i>                | 0.315 ± 0.07    | 0.510 ± 0.228 | < .001 |
| <i>MDLAAO, mm</i>                | 27.6 ± 4.6      | 26.6 ± 3.7    | .192   |
| <i>LAA depth, mm</i>             | 40.1 ± 10.7     | 36.2 ± 7.2    | .160   |
| <i>Morphology classification</i> |                 |               | .005   |
| Cauliflower                      | 31 (53.4)       | 35 (28.9)     |        |
| Windsock                         | 2 (3.4)         | 14 (11.6)     |        |
| Chicken wing                     | 4 (6.9)         | 21 (17.4)     |        |
| Cactus                           | 21 (36.2)       | 51 (42.1)     |        |
| Orifice type                     |                 |               | .291   |
| Oval                             | 46 (38)         | 24 (41.4)     |        |
| Round                            | 28 (23.1)       | 18 (31)       |        |
| Teardrop                         | 11 (9.1)        | 1 (1.7)       |        |
| Triangle                         | 1 (0.8)         | 0 (0)         |        |
| Footprint                        | 2 (1.7)         | 0 (0)         |        |

APTT, activated partial thromboplastin time; INR, International Normalized Ratio; LAA, left atrial appendage; LAAFV, left atrial appendage flow velocity; LAD, left atrial diameter; LVEF, left ventricular ejection fraction; MDLAAO, maximum diameter of left atrial appendage ostium; PT, prothrombin time.

**Figure 1 of the supplementary data.** Enrichment analysis of gene ontology (GO) terms for identified proteins. The bar chart displays the top 20 enriched GO terms categorized into 3 main GO categories: biological process (BP), molecular function (MF), and cellular component (CC). Each bar represents the number of proteins associated with a specific GO term. The color of the bars indicates the *P*-value of the enrichment, with darker shades representing more significant enrichment.

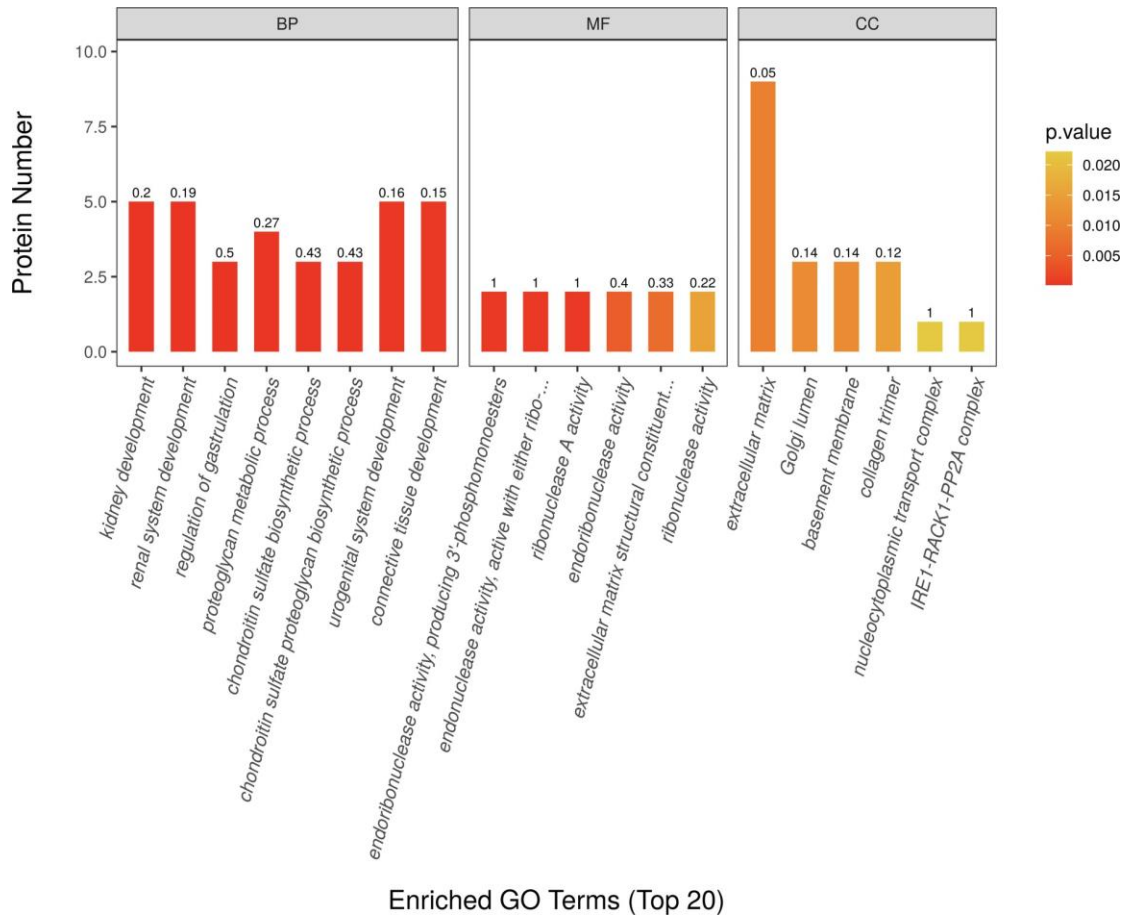

**Figure 2 of the supplementary data.** Differential pathway enrichment analysis based on KEGG database. This horizontal bar chart represents the pathways significantly enriched with upregulated (shown in red) and downregulated (shown in blue) proteins, as identified through our study. The length of each bar correlates with the  $-\log_{10}(P \text{ value})$ , indicating the significance of enrichment: longer bars correspond to higher levels of significance.

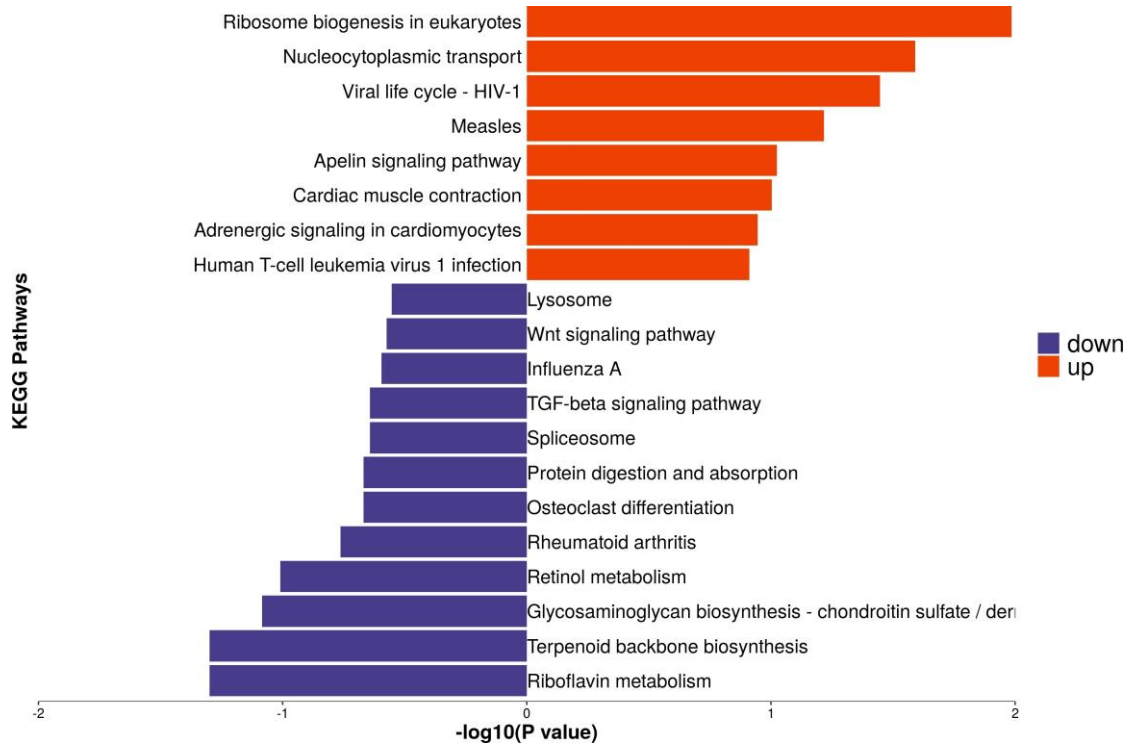

**Figure 3 of the supplementary data.** Results of univariate logistic regression. LAA, left atrial appendage; LAD, left atrial diameter; LVEF, left ventricular ejection fraction; CRP, C-reactive protein; LAAFV, left atrial appendage flow velocity; APTT, activated partial thromboplastin time; PT, prothrombin time, PCYOX1, prenylcysteine oxidase 1; MYL4, myosin light chain 4.

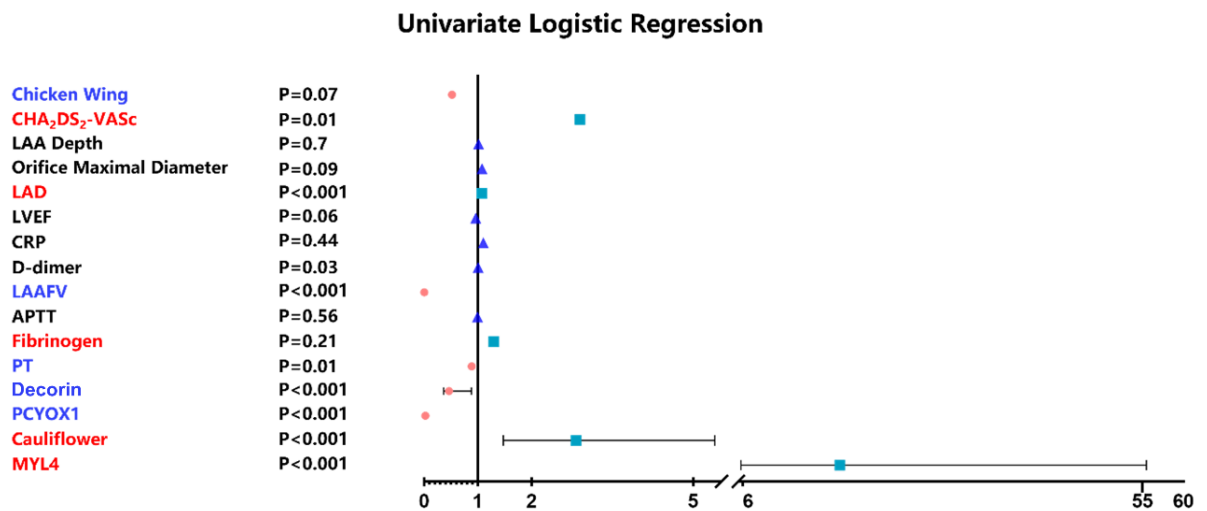

**Figure 4 of the supplementary data.** Calibration curve for the nomogram predicting LAAT/SEC. The dashed line represents the performance of the nomogram, while the solid line corrects any deviation in the nomogram.

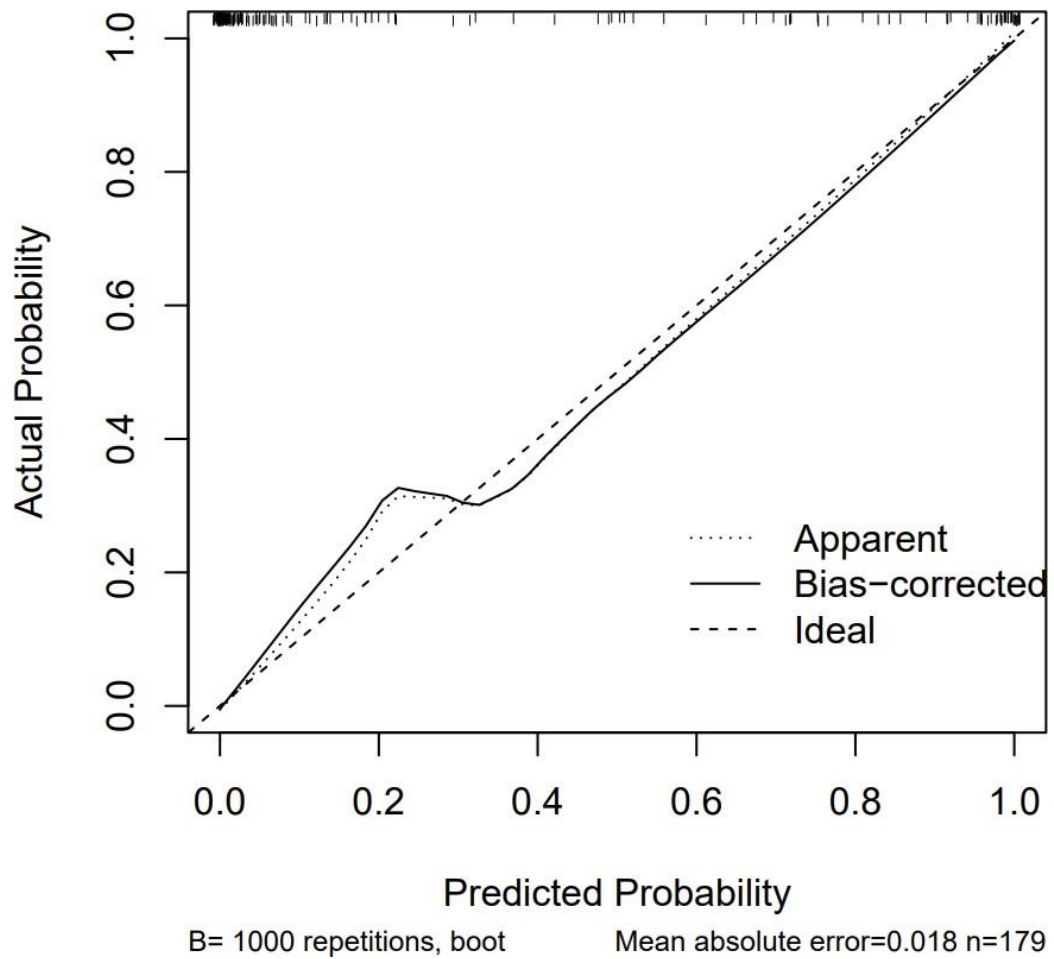

Supplement: mmc1 [file mmc1.pdf]
